# Supplementary material for: Enhancing disaster risk resilience using greenspace in urbanising Quito, Ecuador
Source: Copernicus journal article supplement (doi:10.5194/nhess-2022-20), 2022-01-25
Supplement: Supplementary file 1 [file nhess-2022-20-supplement.pdf]

# Supplement: Enhancing disaster risk resilience using greenspace in urbanising Quito, Ecuador

C. Scott Watson<sup>1</sup>, John R. Elliott<sup>1</sup>, Susanna K. Ebmeier<sup>1</sup>, María Antonieta Vásquez<sup>2</sup>, Camilo Zapata<sup>2</sup>, Santiago Bonilla-Bedoya<sup>3</sup>, Paulina Cubillo<sup>4</sup>, Diego Francisco Orbe<sup>4</sup>, Marco Córdova<sup>5</sup>, Jonathan Menoscal<sup>5</sup>, Elisa Sevilla<sup>2</sup>

<sup>1</sup>COMET, School of Earth and Environment, University of Leeds, Leeds, LS2 9JT, UK.

<sup>2</sup>College of Social Sciences and Humanities, Universidad San Francisco de Quito, Quito 170901, Ecuador.

<sup>3</sup>Research Center for the Territory and Sustainable Habitat, Universidad Tecnológica Indoamérica, Machala y Sabanilla, 170301, Quito, Ecuador.

<sup>4</sup>Centro de Información Urbana de Quito - CIUQ, Quito, Ecuador. - [pcubillo@ciuq.ec](mailto:pcubillo@ciuq.ec), - [dorbe@ciuq.ec](mailto:dorbe@ciuq.ec)

<sup>5</sup>Facultad Latinoamericana de Ciencias Sociales - Flacso, Quito, Ecuador. - [mcardova@flacso.edu.ec](mailto:mcordova@flacso.edu.ec)

*Correspondence to:* C. Scott Watson ([c.s.watson@leeds.ac.uk](mailto:c.s.watson@leeds.ac.uk))

**Supplementary Table 1. Random Forest classification parameters**

| Parameter                             | Value |
|---------------------------------------|-------|
| Orfeo Toolbox Version                 | 7.1.0 |
| Maximum tree depth                    | 15    |
| Minimum samples in each node          | 10    |
| Maximum number of trees in the forest | 200   |

**Supplementary Table 2. Tri-stereo Pleiades 1A and 1B satellite Panchromatic (P) and Multispectral (MS) imagery acquisitions over Quito**

| Acquisition ID                           | Incidence angle | Incidence angle along track | Incidence angle across track |
|------------------------------------------|-----------------|-----------------------------|------------------------------|
| PHR1B_P_201911051539138_SEN_5226204101-1 | 17.3            | 13.0                        | 11.7                         |
| PHR1B_P_201911051538569_SEN_5226205101-1 | 14.1            | 2.9                         | 13.8                         |
| PHR1B_P_201911051538363_SEN_5226203101-1 | 18.7            | -9.6                        | 16.3                         |
| PHR1A_P_202007281543126_SEN_5226201101-1 | 16.0            | 15.9                        | 2.1                          |
| PHR1A_P_202007281542408_SEN_5226202101-1 | 6.9             | -3.2                        | 6.1                          |
| PHR1A_P_202007281542286_SEN_5226200101-1 | 12.9            | -10.5                       | 7.7                          |
| PHR1A_P_202006061542505_SEN_5226222101-1 | 15.4            | 14.8                        | 4.2                          |
| PHR1A_P_202006061542505_SEN_5226219101-1 | 15.0            | 14.7                        | 3.4                          |
| PHR1A_P_202006061542505_SEN_5226216101-1 | 15.4            | 14.9                        | 4.1                          |
| PHR1A_P_202006061542345_SEN_5226223101-1 | 8.2             | 5.4                         | 6.2                          |

|                                           |      |       |       |
|-------------------------------------------|------|-------|-------|
| PHR1A_P_202006061542345_SEN_5226220101-1  | 7.6  | 5.4   | 5.5   |
| PHR1A_P_202006061542345_SEN_5226217101-1  | 8.1  | 5.4   | 6.2   |
| PHR1A_P_202006061542001_SEN_5226221101-1  | 18.3 | -15.4 | 10.5  |
| PHR1A_P_202006061542001_SEN_5226218101-1  | 18.2 | -15.5 | 10.0  |
| PHR1A_P_202006061542001_SEN_5226215101-1  | 18.3 | -15.3 | 10.5  |
| PHR1A_P_202002091550109_SEN_5226213101-1  | 18.0 | 10.0  | -15.3 |
| PHR1A_P_202002091549474_SEN_5226214101-1  | 13.1 | -4.3  | -12.5 |
| PHR1A_P_202002091549241_SEN_5226212101-1  | 20.1 | -18.0 | -9.5  |
| PHR1A_P_202001281542515_SEN_5226210101-1  | 16.9 | 16.8  | 1.7   |
| PHR1A_P_202001281542515_SEN_5226207101-1  | 17.1 | 17.0  | 1.9   |
| PHR1A_P_202001281542169_SEN_5226211101-1  | 7.2  | -3.7  | 6.1   |
| PHR1A_P_202001281542169_SEN_5226208101-1  | 7.4  | -3.7  | 6.4   |
| PHR1A_P_202001281542033_SEN_5226209101-1  | 14.2 | -12.0 | 7.9   |
| PHR1A_P_202001281542033_SEN_5226206101-1  | 14.3 | -12.0 | 8.1   |
| PHR1B_MS_201911051539138_SEN_5226204101-2 | 17.3 | 13.0  | 11.7  |
| PHR1B_MS_201911051538569_SEN_5226205101-2 | 14.1 | 2.9   | 13.8  |
| PHR1B_MS_201911051538363_SEN_5226203101-2 | 18.7 | -9.6  | 16.3  |
| PHR1A_MS_202007281543126_SEN_5226201101-2 | 16.0 | 15.9  | 2.1   |
| PHR1A_MS_202007281542408_SEN_5226202101-2 | 6.9  | -3.2  | 6.1   |
| PHR1A_MS_202007281542286_SEN_5226200101-2 | 12.9 | -10.5 | 7.7   |
| PHR1A_MS_202006061542505_SEN_5226222101-2 | 15.4 | 14.8  | 4.2   |
| PHR1A_MS_202006061542505_SEN_5226219101-2 | 15.0 | 14.7  | 3.4   |
| PHR1A_MS_202006061542505_SEN_5226216101-2 | 15.4 | 14.9  | 4.1   |
| PHR1A_MS_202006061542345_SEN_5226223101-2 | 8.2  | 5.4   | 6.2   |
| PHR1A_MS_202006061542345_SEN_5226220101-2 | 7.6  | 5.4   | 5.5   |
| PHR1A_MS_202006061542345_SEN_5226217101-2 | 8.1  | 5.4   | 6.2   |
| PHR1A_MS_202006061542001_SEN_5226221101-2 | 18.3 | -15.4 | 10.5  |
| PHR1A_MS_202006061542001_SEN_5226218101-2 | 18.2 | -15.5 | 10.0  |
| PHR1A_MS_202006061542001_SEN_5226215101-2 | 18.3 | -15.3 | 10.5  |
| PHR1A_MS_202002091550109_SEN_5226213101-2 | 18.0 | 10.0  | -15.3 |
| PHR1A_MS_202002091549474_SEN_5226214101-2 | 13.1 | -4.3  | -12.5 |
| PHR1A_MS_202002091549241_SEN_5226212101-2 | 20.1 | -18.0 | -9.5  |
| PHR1A_MS_202001281542515_SEN_5226210101-2 | 16.9 | 16.8  | 1.7   |
| PHR1A_MS_202001281542515_SEN_5226207101-2 | 17.1 | 17.0  | 1.9   |
| PHR1A_MS_202001281542169_SEN_5226211101-2 | 7.2  | -3.7  | 6.1   |
| PHR1A_MS_202001281542169_SEN_5226208101-2 | 7.4  | -3.7  | 6.4   |
| PHR1A_MS_202001281542033_SEN_5226209101-2 | 14.2 | -12.0 | 7.9   |
| PHR1A_MS_202001281542033_SEN_5226206101-2 | 14.3 | -12.0 | 8.1   |

**Supplementary Table 3. Safe spaces identified by the Metropolitan District of Quito (DMQ). A list of 79 safe spaces was shared by DMQ over Twitter on 18 May 2016 (link below). Although details on these spaces were lacking at the time of writing, we matched geographic locations to 66 of these safe spaces for use in our analysis.**

[https://twitter.com/MunicipioQuito/status/732977861716480000?ref\\_src=twsrc%5Etfw%7Ctwcamp%5Etwetembed%7Ctwtterm%5E732977861716480000%7Ctwgr%5E%7Ctwcon%5Es1\\_c10&ref\\_url=https%3A%2F%2Fpublish.twitter.com%2F%3Fquery%3Dhttps3A2F2Ftwitter.com2FMunicipioQuito2Fstatus2F732977861716480000widget%3DTweet](https://twitter.com/MunicipioQuito/status/732977861716480000?ref_src=twsrc%5Etfw%7Ctwcamp%5Etwetembed%7Ctwtterm%5E732977861716480000%7Ctwgr%5E%7Ctwcon%5Es1_c10&ref_url=https%3A%2F%2Fpublish.twitter.com%2F%3Fquery%3Dhttps3A2F2Ftwitter.com2FMunicipioQuito2Fstatus2F732977861716480000widget%3DTweet)

| Safe space name                               | Type              | Area (m2) |
|-----------------------------------------------|-------------------|-----------|
| CENTRAL DE CARCELEN - BEV                     | Park              | 70,650    |
| CARDENAL DE LA TORRE                          | Park              | 19,889    |
| EUGENIO ESPEJO                                | Park              | 9,838     |
| EXPLANADA DE LA UNIDAD EDUCATIVA MUNICIPAL    |                   | 38,736    |
| PLAZA QUITUMBE                                |                   | 192       |
| ESTADIO LA HOSPITALARIA                       |                   | 9,124     |
| LA BOMBONERITA                                | Recreation ground | 10,840    |
| UTAQ                                          | Recreation ground | 60,514    |
| COMPLEJO DE PELOTA NACIONAL                   |                   | 11,330    |
| PLAZA SAN BLAS                                |                   | 3,255     |
| EL ARBOLITO                                   | Park              | 36,187    |
| INGLES                                        | Park              | 56,669    |
| LA MOYA                                       | Park              | 65,961    |
| DE LA VINCENTINA                              | Park              | 1,395     |
| COOP 14 DE ENERO                              | Recreation ground | 17,504    |
| PARQUE CENTRAL DE LA COMUNA DE SAN MIGUEL     |                   | 1,418     |
| PLAZA GRANDE                                  |                   | 7,412     |
| MERCADO DE LLANO GRANDE                       |                   | 28,977    |
| METROPOLITANO ARMENIA (LUCIANO ANDRADE MARIN) | Park              | 483,710   |
| ISLA SEYMUR                                   |                   | 23,488    |
| BICENTENARIO                                  | Park              | 1,376,996 |
| LA PAMPA                                      | Park              | 25,214    |
| LAS CUADRAS                                   | Park              | 198,569   |

| Safe space name                   | Type              | Area (m2) |
|-----------------------------------|-------------------|-----------|
| YAHUACHI                          | Park              | 3,113     |
| LIGA BARRIAL LA VICENTINA         | Recreation ground | 7,135     |
| CAUPICHO                          | Park              | 41,517    |
| PLAZA SAN FRANCISCO               |                   | 6,916     |
| METROPOLITANO NORTE GUANGUILTAGUA | Park              | 5,579,186 |
| RESERVORIO CUMBAYA                | Park              | 27,705    |
| JAIME SALVADOR BORJA              | Park              | 4,418     |
| ITCHIMBIA                         | Park              | 583,832   |
| BATALLÓN CHIMBORAZO               | Park              | 11,618    |
| SIMON BOLIVAR - LA ALAMEDA        | Park              | 61,208    |
| PARQUE DE TRATAMIENTO PUENGASI    |                   | 318,137   |
| SAN JUAN DE CONOCOTO              | Recreation ground | 6,426     |
| DE LA MUJER Y EL NIÑO             | Park              | 64,699    |
| LA CAROLINA                       | Park              | 612,983   |
| LA LUZ                            | Recreation ground | 8,614     |
| SIXTO MARIA DURAN                 | Park              | 7,054     |
| ESTADIO LIGA ORIENTAL             | Recreation ground | 14,809    |
| CONCEPCIÓN SUR                    |                   | 1,987     |
| ANDALUCIA                         | Park              | 5,941     |
| ESTADIO TOLONTAG                  | Recreation ground | 16,765    |
| LA BATEA B                        | Recreation ground | 11,414    |
| TERESA DE CEPEDA                  | Park              | 12,599    |
| 17 DE JULIO                       | Park              | 6,288     |
| JULIO MATOVELLE                   | Park              | 10,390    |
| EL EJIDO                          | Park              | 133,064   |
| 4 DE DICIEMBRE                    | Recreation ground | 3,976     |

| Safe space name       | Type              | Area (m2) |
|-----------------------|-------------------|-----------|
| PLAZA SANTO DOMINGO   |                   | 5,021     |
| CUARTEL EPLICACHIMA   |                   | 157,287   |
| LA RAYA               | Park              | 97,556    |
| DE LAS DIVERSIDADES   | Recreation ground | 14,853    |
| OBRERO INDEPENDIENTE  | Park              | 10,617    |
| PARQUE METRO          |                   | 9,926     |
| PLAZA CHICA           |                   | 454       |
| EINSTEIN              | Recreation ground | 17,937    |
| ESTADIO CHIMBACALLE   | Recreation ground | 23,647    |
| SOLANDA S2            | Park              | 13,757    |
| ECOLOGICO SOLANDA     | Park              | 25,550    |
| NUEVA AURORA          | Park              | 51,024    |
| LIGA BARRIAL SOLANDA  | Recreation ground | 29,534    |
| METROPOLITANO DEL SUR | Park              | 6,669,206 |
| BELLAVISTA ESTADIO    | Park              | 15,342    |
| Solanda S4            | Park              | 18,630    |
| HERALDO               | Park              | 14,222    |

**Supplementary Table 4. Land cover classification results and accuracy matrix.**

| Class                 | Area (km <sup>2</sup> ) | ± 95% CI | User's Accuracy (%) | Producer's Accuracy (%) | Overall Accuracy (%) |
|-----------------------|-------------------------|----------|---------------------|-------------------------|----------------------|
| <b>1986</b>           |                         |          |                     |                         |                      |
| Urban                 | 159.74                  | 49.41    | 86.0                | 46.6                    | 82.8                 |
| Woodland              | 867.30                  | 66.70    | 93.0                | 83.4                    |                      |
| Agriculture/grassland | 361.96                  | 69.47    | 88.5                | 48.0                    |                      |
| Scrub vegetation/bare | 1,347.03                | 96.45    | 77.3                | 96.2                    |                      |
| <b>2020</b>           |                         |          |                     |                         |                      |
| Urban                 | 351.76                  | 47.02    | 93.4                | 63.6                    | 81.1                 |
| Woodland              | 1,030.61                | 65.69    | 85.0                | 89.0                    |                      |

|                           |        |       |      |      |  |
|---------------------------|--------|-------|------|------|--|
| Agriculture/<br>grassland | 484.73 | 62.46 | 88.5 | 56.0 |  |
| Scrub<br>vegetation/bare  | 874.19 | 71.45 | 72.6 | 92.7 |  |

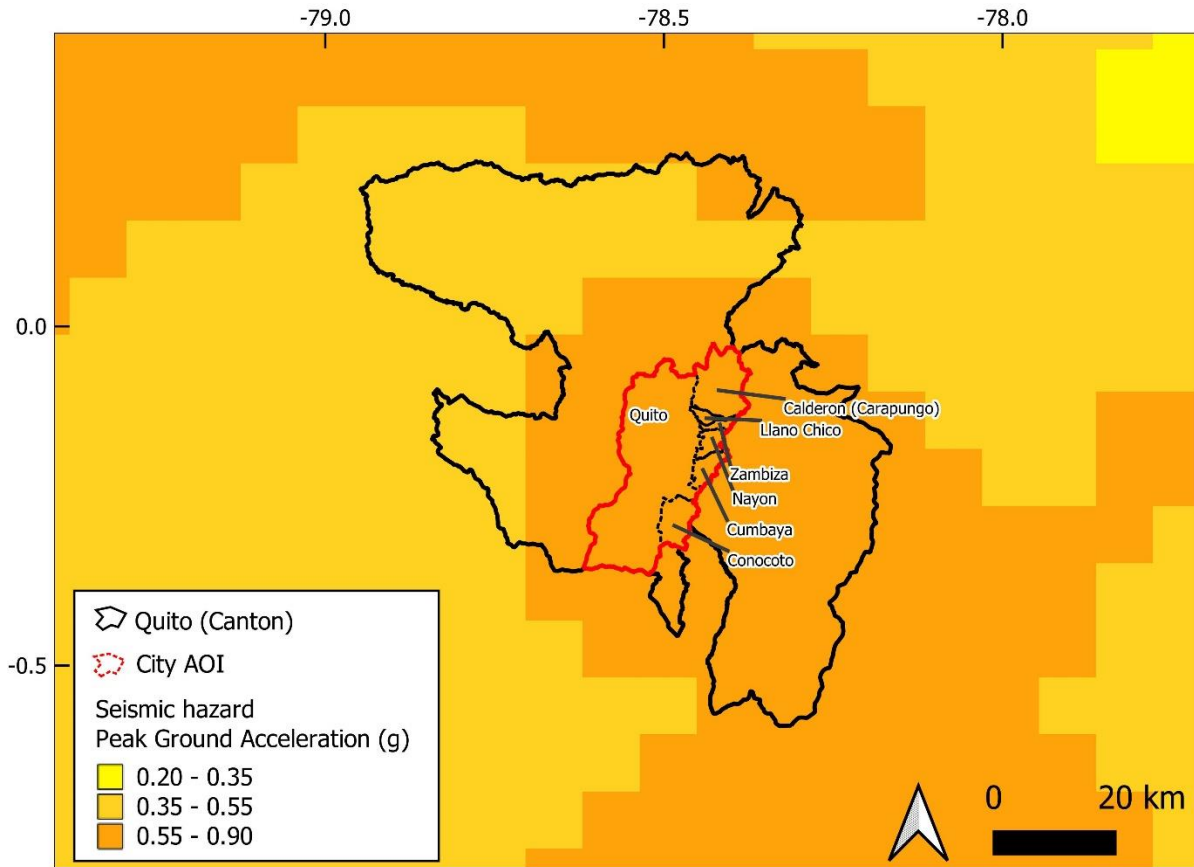

M. Pagani, J. Garcia-Pelaez, R. Gee, K. Johnson, V. Poggi, R. Styron, G. Weatherill, M. Simionato, D. Viganò, L. Danciu, D. Monelli (2018). Global Earthquake Model (GEM) Seismic Hazard Map (version 2018.1 - December 2018), DOI: 10.13117/GEM-GLOBAL-SEISMIC-HAZARD-MAP-2018.1

**Figure S1. Global Earthquake Model seismic hazard for Quito.**

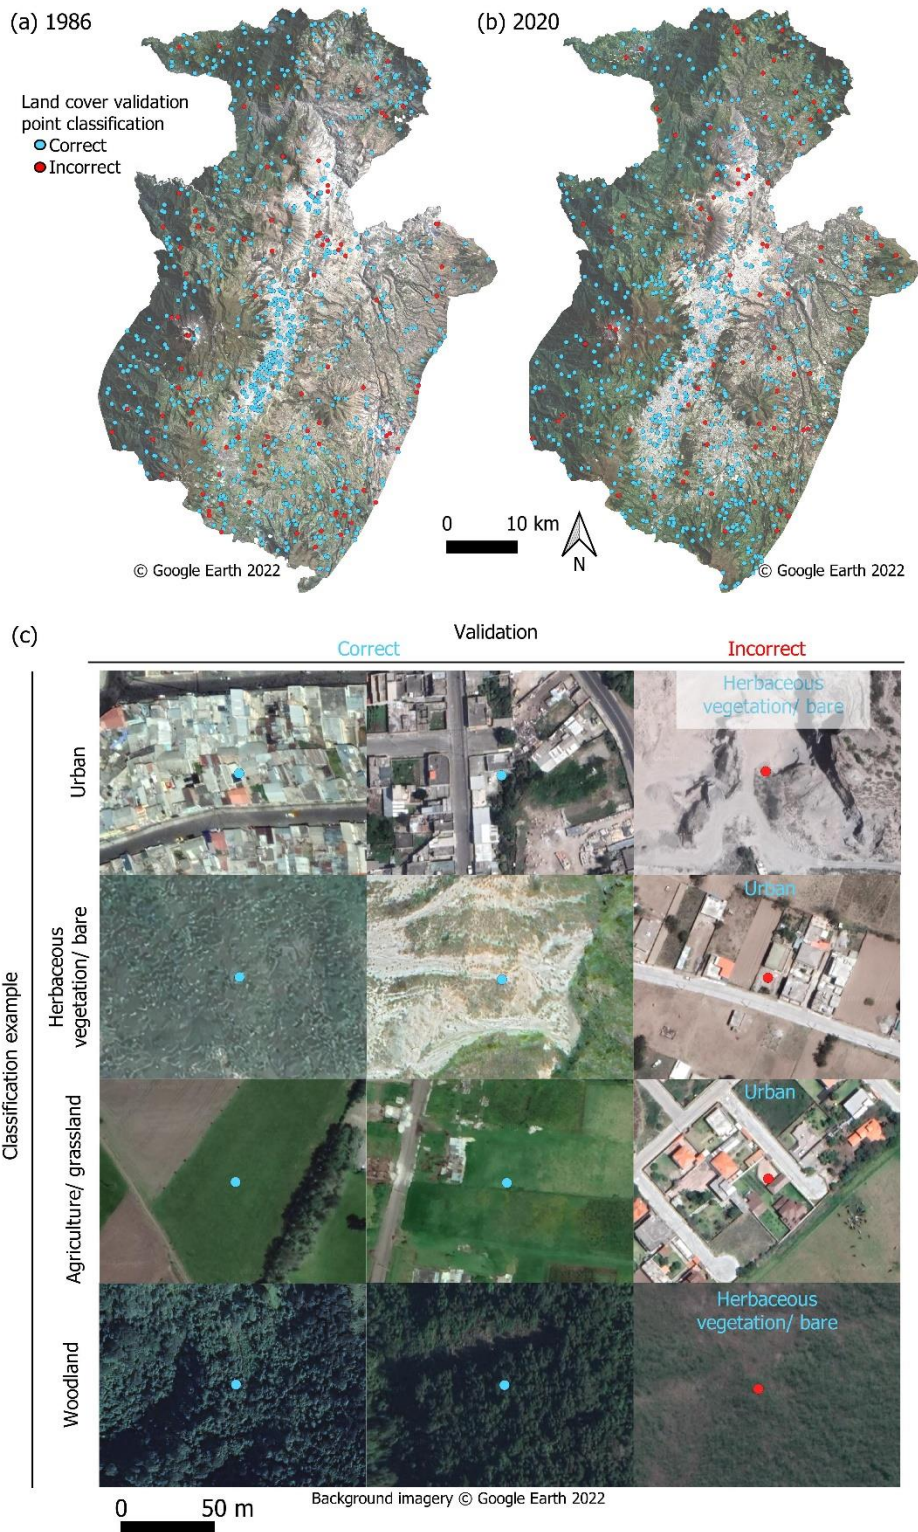

**Figure S2. (a-b) Validation of the Random Forest Classification using 800 validation points. (c) Example land cover classifications and corresponding satellite imagery from a Google Earth basemap.**

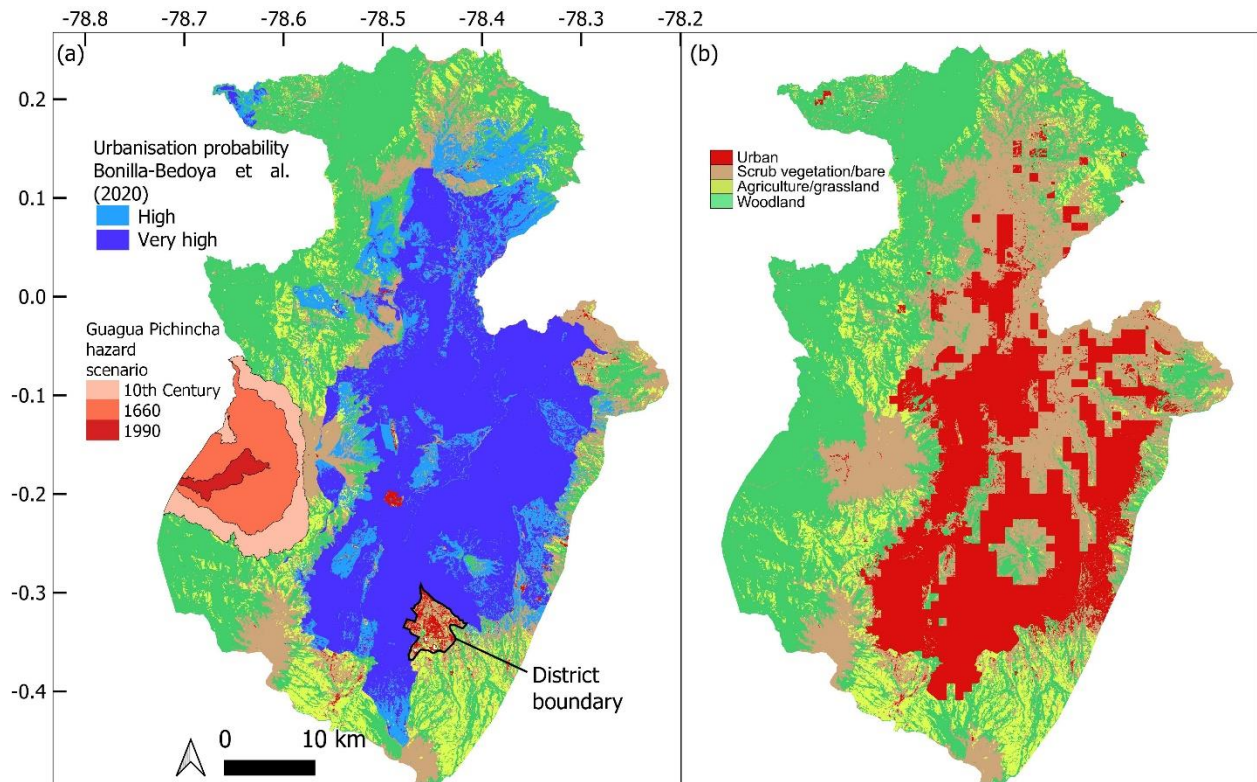

**Figure S3. (a) Urbanisation probability from Bonilla-Bedoya et al. (2020). Guagua Pichincha Volcano hazards scenarios are shown from IG-EPN et al. (2019). (b) Modified Bonilla-Bedoya et al. (2020) scenario, which excludes urbanisation on the steep slopes of Guagua Pichincha Volcano and for category 5 (high) landslide susceptibility (Fig. S3) (Stanley and Kirschbaum, 2017). An urbanised area crossing the Metropolitan District Boundary was also included.**



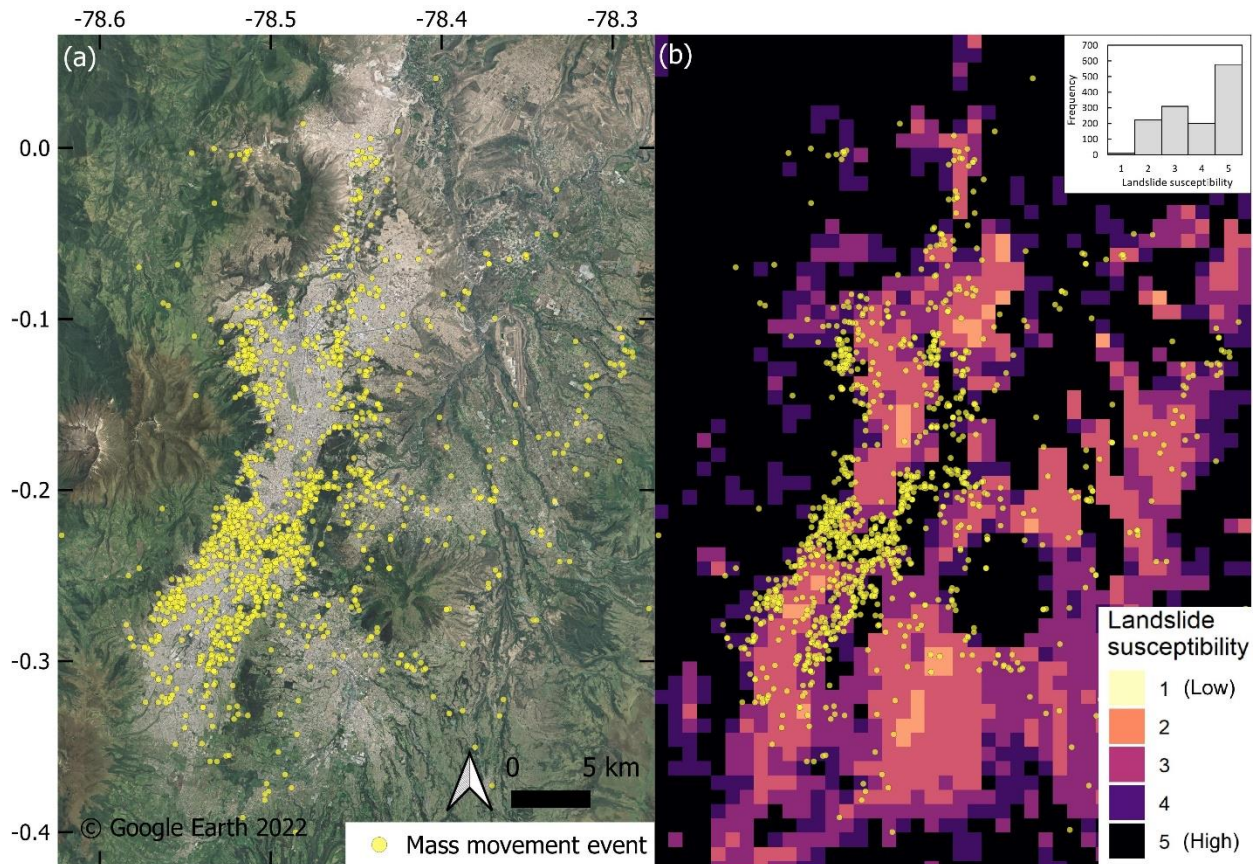

**Figure S4: (a) Open Government records of movement events 2006–2017 ( $n = 1321$ ). Background is a (b) Spatial distribution of the recorded mass movement events in relation to the landslide susceptibility model (Stanley and Kirschbaum, 2017).**

Clustering at road junctions

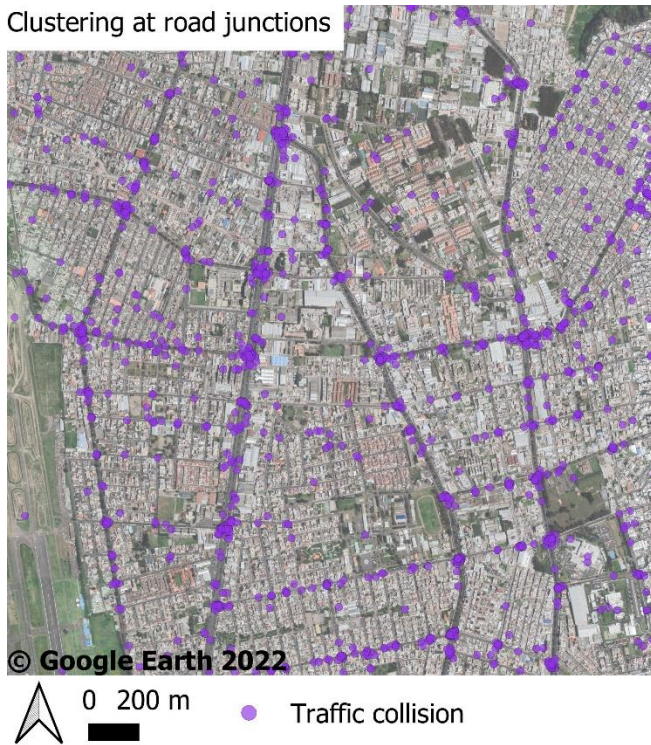

Figure S5: Clustering of traffic collisions at junctions recorded in the Open Government ‘Accidents’ data (<http://gobiernoabierto.quito.gob.ec/>) were used as a proxy to estimate the positional uncertainty of flood records in the same database. Location: -78.47845,-0.12923.

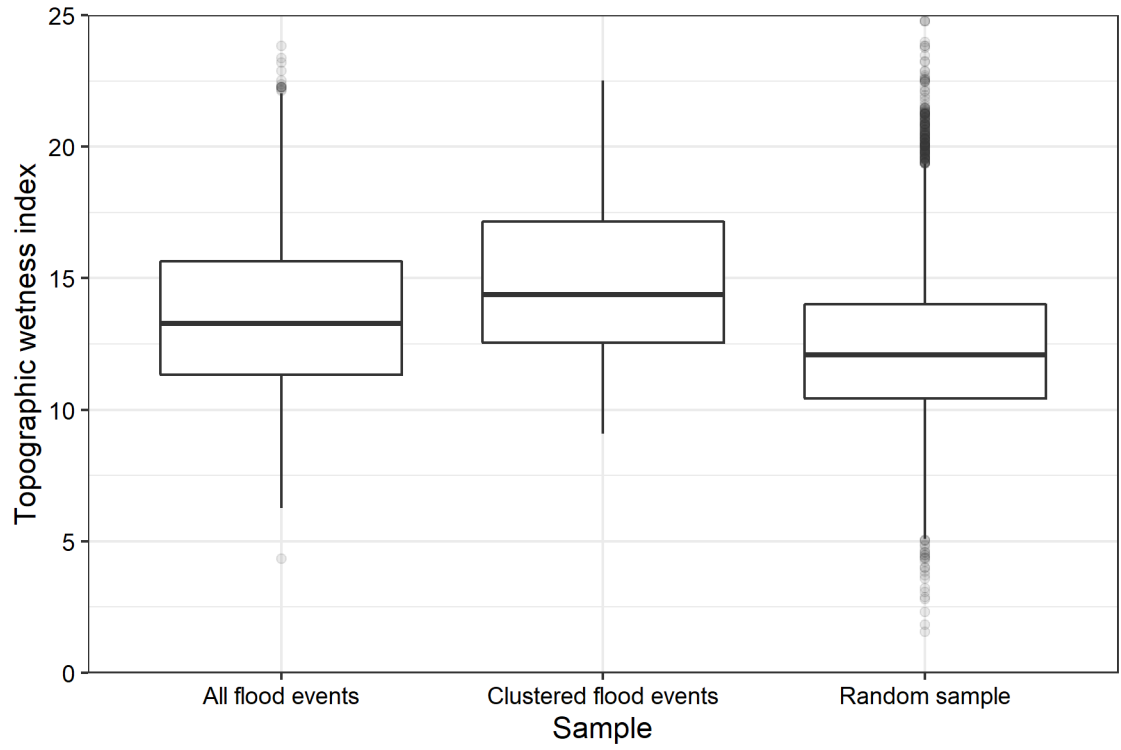

**Figure S6: Topographic Wetness Index (TWI) for flood events in Quito recorded in Ecuador’s Open Government Database. The TWI is shown for all flood events (n = 1,274), clustered flood events where two events are recorded within 40 m of each other (n= 125), and a random sample of TWI values (n = 10,000)**

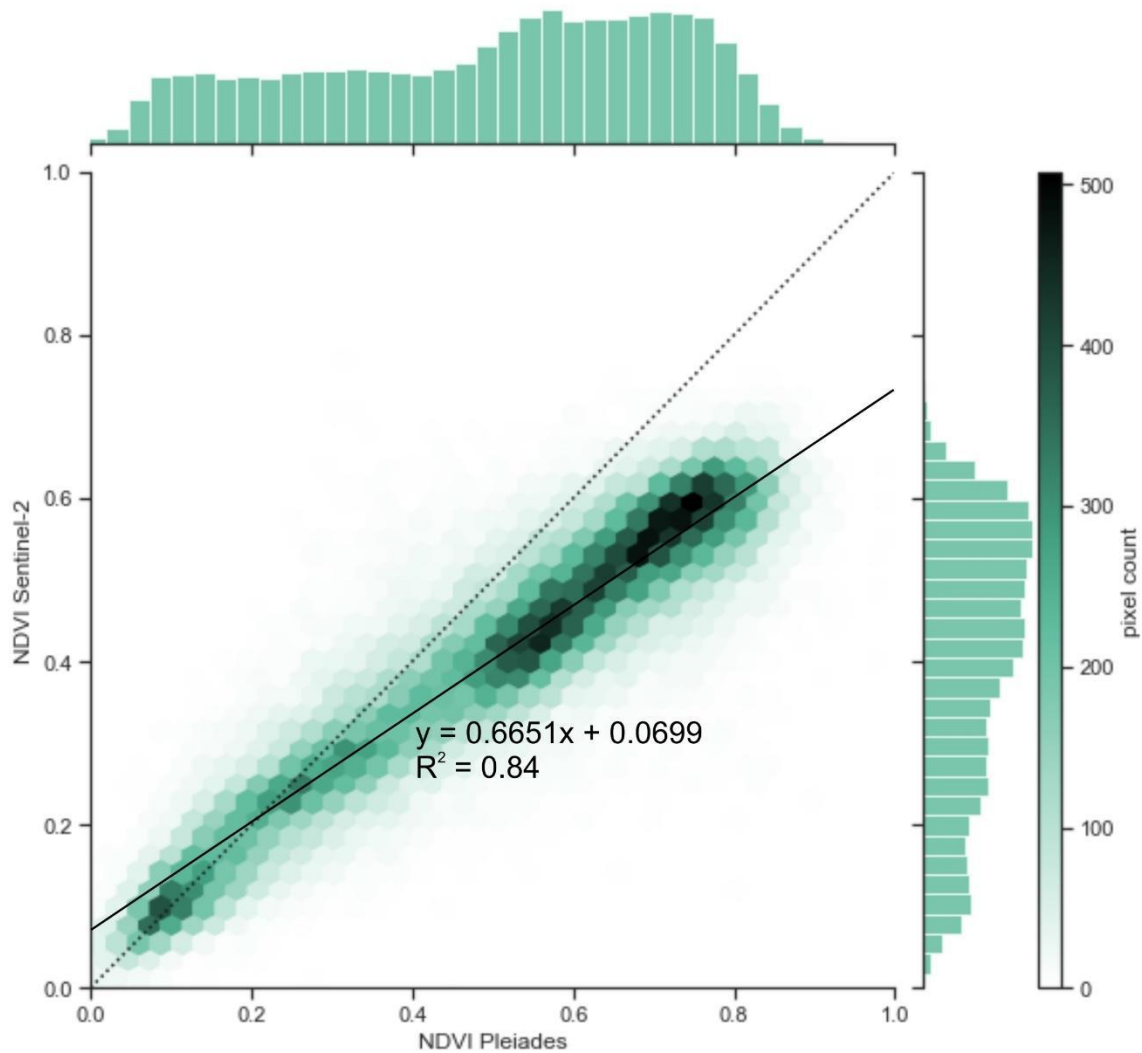

**Figure S7. Correlation between Pleiades and Sentinel-2 derived NDVI values. Several factors complicate a direct association between Pleiades and Sentinel-2 NDVI values. (1) The Pleiades NDVI was derived from a composite of five image acquisitions (Supplementary Table 2) whereas the Sentinel-2 acquisition was from a single date (6<sup>th</sup> February 2020), hence the spectral characteristics of the ground would have changed. Acquisitions on 28 January 2020 and 6<sup>th</sup> June 2020 had the largest overlap with the 6<sup>th</sup> February 2020 Sentinel-2 acquisition. (2) The sensor bands have overlapping but different bandwidths (Pleiades: red 590–710 nm, NIR 740–940 nm, Sentinel-2: red 649–680, NIR 780–886).**

## References

- Bonilla-Bedoya, S., Mora, A., Vaca, A., Estrella, A., and Herrera, M. Á.: Modelling the relationship between urban expansion processes and urban forest characteristics: An application to the Metropolitan District of Quito, *Computers, Environment and Urban Systems*, 79, 101420, <https://doi.org/10.1016/j.compenvurbsys.2019.101420>, 2020.
- IG-EPN, IGM, IRD.: Mapa de Peligros Volcánicos Potenciales del Volcán Guagua Pichincha 3ra. Edición, Quito - Ecuador. Available online: <https://www.igeppn.edu.ec/ggp-mapa-de-peligros/file> (accessed 10 December 2020). 2019.

Stanley, T., and Kirschbaum, D. B.: A heuristic approach to global landslide susceptibility mapping, *Natural Hazards*, 87, 145-164, <https://doi.org/10.1007/s11069-017-2757-y>, 2017.
