# Supplementary material for: Enhancing disaster risk resilience using greenspace in urbanising Quito, Ecuador
Source: Copernicus journal article supplement (doi:10.5194/nhess-2022-20), 2022-01-25
Supplement: Supplementary file [file nhess-2022-20-RC1-supplement.pdf]

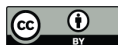

# 1 **Enhancing disaster risk resilience using greenspace in urbanising** 2 **Quito, Ecuador**

3 C. Scott Watson<sup>1</sup>, John R. Elliott<sup>1</sup>, Susanna K. Ebmeier<sup>1</sup>, María Antonieta Vásquez<sup>2</sup>, Camilo Zapata<sup>2</sup>,  
4 Santiago Bonilla-Bedoya<sup>3</sup>, Paulina Cubillo<sup>4</sup>, Diego Francisco Orbe<sup>4</sup>, Marco Córdova<sup>5</sup>, Jonathan  
5 Menoscal<sup>5</sup>, Elisa Sevilla<sup>2</sup>

6  
7 <sup>1</sup>COMET, School of Earth and Environment, University of Leeds, Leeds, LS2 9JT, UK.

8 <sup>2</sup>College of Social Sciences and Humanities, Universidad San Francisco de Quito, Quito 170901, Ecuador.

9 <sup>3</sup>Research Center for the Territory and Sustainable Habitat, Universidad Tecnológica Indoamérica, Machala y Sabanilla,  
10 170301, Quito, Ecuador.

11 <sup>4</sup>Centro de Información Urbana de Quito - CIUQ, Quito, Ecuador.

12 <sup>5</sup>Facultad Latinoamericana de Ciencias Sociales - Flacso, Quito, Ecuador.

13

14 *Correspondence to:* C. Scott Watson (c.s.watson@leeds.ac.uk)

## 15 **Abstract**

16 Greenspaces within broader ecosystem-based disaster risk reduction strategies (Eco-DRR) provide multiple benefits to  
17 society, biodiversity, and addressing climate breakdown. In this study, we investigated urban growth, its intersection with  
18 hazards, and the availability of greenspace for disaster risk reduction (DRR) in the city of Quito, Ecuador, which experiences  
19 multiple hazards including landslides, floods, volcanoes, and earthquakes. We used satellite data to quantify urban sprawl  
20 and developed a workflow incorporating high resolution digital elevation models (DEMs) to identify potential greenspaces  
21 for emergency refuge accommodation (DRR greenspace), for example following an earthquake. Quito's historical urban  
22 growth totalled ~192 km<sup>2</sup> 1986–2020 and was primarily on flatter land crossed by deep ravines. By contrast, future  
23 projections indicate an increasing intersection between easterly urbanisation and steep areas of high landslide susceptibility.  
24 Therefore, a timely opportunity exists for future risk-informed planning. Our workflow identified 18.6 km<sup>2</sup> of DRR  
25 greenspaces, of which 16.3 km<sup>2</sup> intersected with potential sources of landslide and flood hazards, indicating that hazard  
26 events could impact potential 'safe spaces'. These spaces could mitigate future risk if designated as greenspaces and left  
27 undeveloped. DRR greenspace overlapped 7% (2.5 km<sup>2</sup>) with municipality designated greenspace. Similarly, 10% (1.7 km<sup>2</sup>)  
28 of municipality designated 'safe space' for use following an earthquake was classified as potentially DRR suitable in our  
29 analysis. For emergency refuge, currently designated greenspaces could accommodate ~2–14% of Quito's population within  
30 800 m. This increases to 8–40% considering all the potential DRR greenspace mapped in this study. Therefore, a gap exists

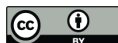

31 between the provision of DRR and designated greenspace. Within Quito, we found a disparity between access to greenspaces  
32 across socio-economic groups with lower income groups having less access and further to travel to designated greenspaces.  
33 **Notably, the accessibility of greenspaces was high overall with 98% (2.3 million) of Quito's population within 800 m of a**  
34 **designated greenspace, of which 88% (2.1 million) had access to potential DRR greenspaces.** Our workflow demonstrates a  
35 citywide evaluation of DRR greenspace potential and provides the foundation upon which to evaluate these spaces with local  
36 stakeholders. Promoting equitable access to greenspaces, communicating their multiple benefits, and considering their use to  
37 restrict propagating development into hazardous areas are key themes that emerge for further investigation.

## 38 **1 Introduction**

39 Urbanising and increasing populations are a global trend that create a range of societal and environmental challenges  
40 including food and water security (Godfray et al., 2010; Hoekstra et al., 2018), air pollution (Fenger, 1999; Escobedo and  
41 Nowak, 2009; Zalakeviciute et al., 2018), disease (Marmot et al., 2008), loss of biodiversity (McDonald et al., 2020), climate  
42 change (De Sherbinin et al., 2007; Flörke et al., 2018), and exposure to disaster risk (Pelling et al., 2004). Approximately  
43 68% of the world's population are projected to live in urban areas by 2050, many of which are yet to be developed, and the  
44 rate of urbanisation is greatest for developing countries (UN DESA, 2019). Development of informal settlements takes place  
45 outside of regulatory frameworks such as land use planning or building design codes (UN-Habitat, 2003; Oliver-Smith et al.,  
46 2016). Therefore, urbanisation often occurs within or creates hazardous areas, which exacerbates the socioeconomic  
47 inequalities of disaster risk due to overcrowding, unsafe housing, and lack of infrastructure and services (Baker, 2012;  
48 Cardona et al., 2012). Reducing disaster risk and losses is the aim of the global Sendai Framework for Disaster Risk  
49 Reduction 2015–2030 (UNDRR, 2015) and is integral to the goal of building sustainable cities and communities (UN  
50 General Assembly, 2015). Additionally, nature-based solutions (NbS) involving greenspace in cities are increasingly  
51 recognised within a framework of Ecosystem-based Disaster Risk Reduction (Eco-DRR) (Estrella and Saalismaa, 2013;  
52 Faivre et al., 2018; UNDRR, 2020) and can be designed and monitored using an increasing number of earth observation  
53 (EO) technologies (Kumar et al., 2021). EO data are widely used for land cover classifications to quantify historical trends in  
54 urban expansion and to model future urbanisation projections (Schneider and Woodcock, 2008; Bonilla-Bedoya et al.,  
55 2020b). Both high-resolution (< 1 m, commercial) (Myint et al., 2011; Georganos et al., 2018) and medium resolution (10–  
56 30 m, open-access) (e.g. Landsat and Sentinel-2) optical satellite imagery are used for land cover and greenspace mapping  
57 (Fuller et al., 1994; Labib and Harris, 2018; Deng et al., 2019).

58  
59 **There are multiple definitions of greenspace, however, they generally include reference to public parks, gardens, open space,**  
60 **wetlands, street verges, woodland, and sports grounds** (Taylor and Hochuli, 2017). Greenspace is associated with multiple  
61 impacts on urban and natural systems (Fig. 1) including: improving mental and physical health (James et al., 2015; WHO  
62 Regional Office for Europe, 2016; Marselle et al., 2020; Bauwelinck et al., 2021); conserving natural ecosystems and



63 biodiversity (Aronson et al., 2017; McDonald et al., 2020); creating economic opportunities (Gregory McPherson, 1992);  
64 building community resilience to hazards (Colding and Barthel, 2013), including reducing landslide risk (Phillips and  
65 Marden, 2005; Sandholz et al., 2018) and urban flooding (Maragno et al., 2018); and providing safe spaces in the event of a  
66 disaster (Shrestha et al., 2018; Sphere Association, 2018; Shimpo et al., 2019; Jeong et al., 2021). **However, greenspace**  
67 **planning in urban environments is often recreation focused** (Boulton et al., 2018). Therefore, it is important to recognise the  
68 provision of multi-benefit greenspaces within an Eco-DRR framework, and the diverse accessibility, ownership, and  
69 management of such spaces (Colding and Barthel, 2013). Similarly, the creation and designation of greenspace requires  
70 consideration of social justice issues, such as the impact on property values (Wolch et al., 2014; García-Lamarca et al.,  
71 2020).

72  
73 Green cities, which incorporate diverse greenspace, green infrastructure, and interconnected social and ecological networks,  
74 provide opportunities to enhance disaster resilience and deliver multiple benefits for sustainable development and nature  
75 conservation (Benedict and MacMahon, 2002; Tidball and Krasny, 2012). These elements may be designed and integrated  
76 into planning policy (Jeong et al., 2021) or emerge following crises, such as loss of food security prompting the proliferation  
77 of urban gardening (Altieri et al., 1999; Gonzalez, 2003; Colding and Barthel, 2013). Similarly, following disaster events  
78 such as earthquakes, open spaces are used for emergency refuge (Allan et al., 2013; Borland, 2020). The latter point was the  
79 case following the 2015 Gorkha earthquake where greenspaces were used for temporary accommodation away from  
80 collapsed and damaged buildings (Fig. 1 b-c). Temporary government camps homed over 30,000 people in the Kathmandu  
81 Valley and over 1,000 smaller shelter sites homed thousands more (Khazai et al., 2015). Greenspace was also prioritised in  
82 Tokyo following the 1923 Great Kantō Earthquake, where parks originally designed to provide space for children were later  
83 valued as emergency refuges (Borland, 2020). Innovative greenspace design elements may also emerge following disaster  
84 events, such as integrating water bodies and pumps, edible plant species, and multi-purpose (e.g. seating, dining, and  
85 cooking) communal seating areas into greenspace areas (Bryant and Allan, 2013).

86  
87 Historically, green space in Quito was defined by the rural-urban relationship. Until the end of the 19th century, green spaces  
88 were the "Ejidos", sites for agriculture and livestock, which were located on the outskirts of the city. The urbanisation model  
89 did not contemplate green spaces in its design and natural spaces such as the ravines were mostly filled in (Aragundi et al.,  
90 2016). This is important because parks and plazas have been repeatedly used as refuge sites after earthquakes in Quito. For  
91 example, during the 1859 Quito earthquake and 1868 Ibarra earthquake, refugee tents were set in the main plazas and parks  
92 of the city (e.g. Figure 1d, e). During the 20th Century, the use of these greenspaces and open spaces like plazas as refuge  
93 after earthquakes was recognised through the creation of official 'safe spaces' (see section 4.3) (Metro Ecuador, 2019).



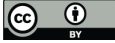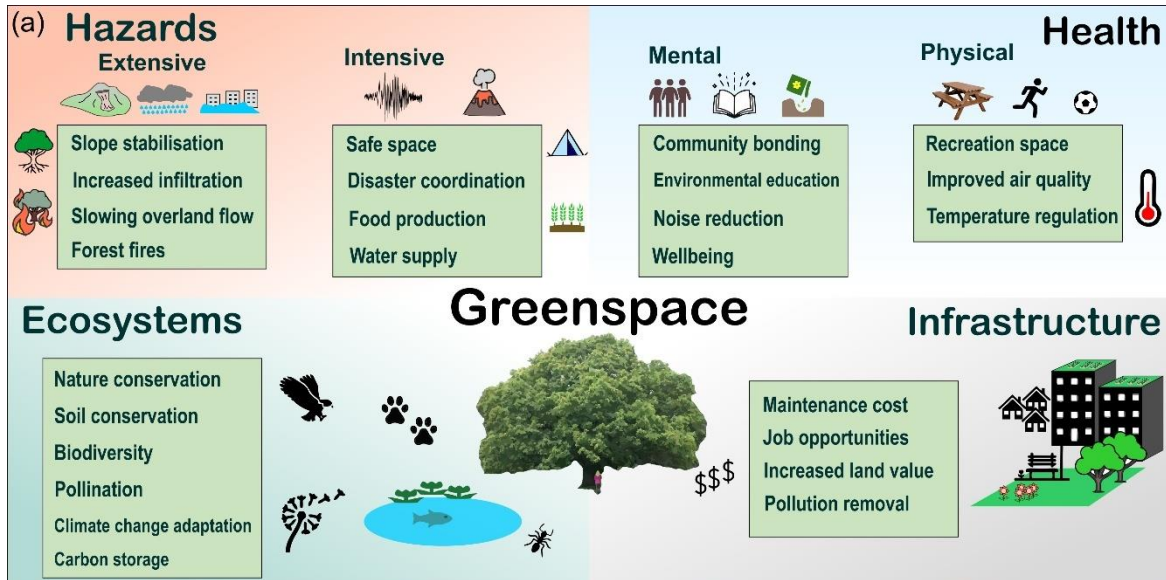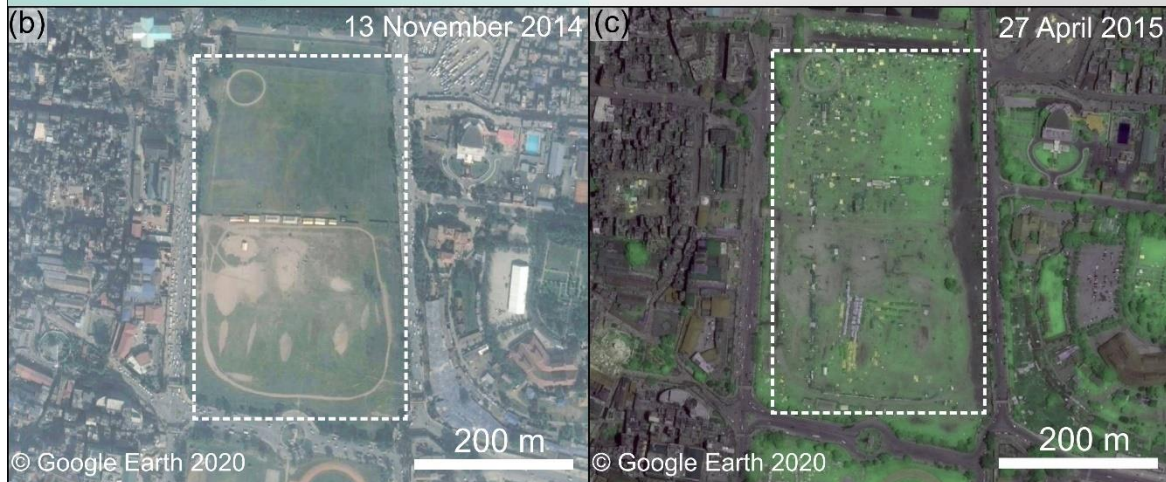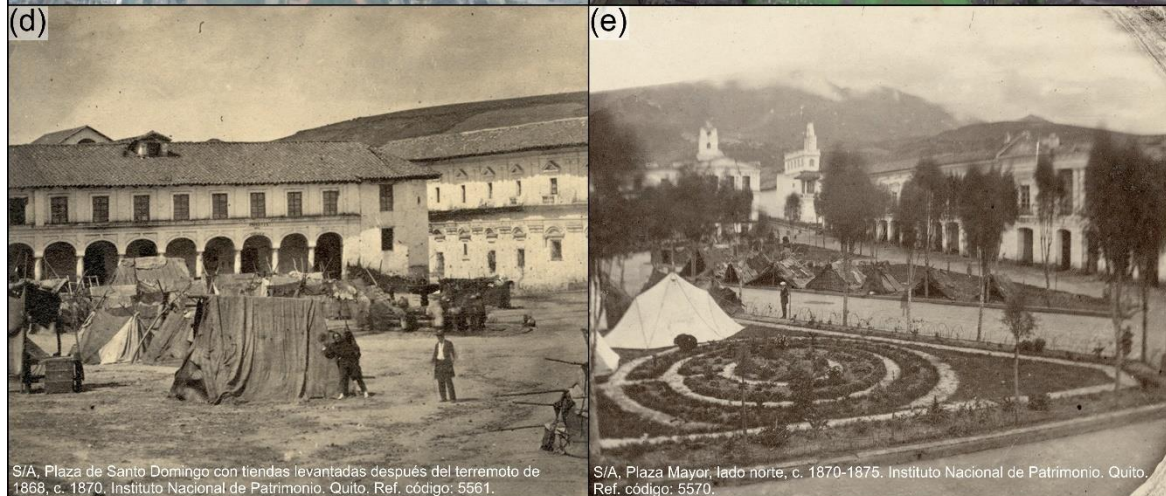



95 **Figure 1: (a) Example impacts of urban greenspace on hazards, health, ecosystems, and infrastructure. (b-c) An area of**  
96 **greenspace ‘Tundikhel’ (Lat: 27.702°, Lon: 85.315°) in Kathmandu, Nepal, which was used for temporary tented accommodation**  
97 **following the Gorkha earthquake (25 April 2015). (d-e) Tents in Plaza Santo Domingo and Plaza Mayor (Plaza Grande) in Quito**  
98 **after the 1868 Ibarra earthquake.**

99

100 Quito has a population of over 2 million (2020), having doubled in just three decades from 1 million in the late 1980s, and  
101 which is projected to exceed 3.4 million by 2040 (DMQ, 2018). The expansion of formal and informal settlements into  
102 hazardous areas increases disaster risk from events including landslides, flooding, volcanic eruptions, and earthquakes.  
103 Increased disaster risk is due to both increased exposure to natural hazards and the social vulnerability of the exposed  
104 communities (e.g. Valcárcel et al., 2017). Therefore, in this study we assessed the potential of greenspace for reducing  
105 disaster risk in contemporary Quito, and for guiding the development of more resilient communities in future urban areas.  
106 Specifically, we: (1) quantified Quito’s recent historical urban expansion using satellite-based optical imagery and evaluated  
107 potential future urbanisation scenarios using land classification metrics; (2) investigated the intersection between the built  
108 environment and natural hazards; and (3) evaluated the potential role of urban greenspace for reducing disaster risk in Quito  
109 by providing ‘safe spaces’. In this study, we define a style of greenspace relevant to disaster risk reduction that is  
110 quantifiable using optical satellite data.

## 111 2 Study region

112 Quito, Ecuador is situated just south of the equator in the Inter-Andean Valley of South America at over 2,800 m a.s.l. and is  
113 bounded by Pichincha Volcano (4794 m) to the west and steep topography to the east (Fig. 2). Topography and factors such  
114 as the intertropical convergence zone and the South Atlantic convergence zone determine Quito’s climate (Hastenrath, 1997;  
115 Vincenti et al., 2012; Zambrano-Barragán et al., 2011). Quito’s precipitation distribution has two modalities, March–April  
116 and October–December, with an average annual precipitation of 1200 mm and an average annual temperature of 13.4°C  
117 (Vincenti et al., 2012; Zambrano-Barragán et al., 2011). In recent decades, Quito’s urban extent has spread many kilometres  
118 to the north, east, and south (Bonilla-Bedoya et al., 2020b; Salazar et al., 2020). Westward expansion is limited, although not  
119 absent, due to the designated protected areas on the slopes of Pichincha volcano, which were implemented following urban  
120 encroachment and the incidence of landslides and floods (Vidal et al., 2015; DMQ, 2018). Urban expansion is changing  
121 Quito’s exposure to natural hazards including landslides, floods, volcanic activity, and earthquakes (Chatelain et al., 1999;  
122 Hall et al., 2008; Carmin and Anguelovski, 2009; Valcárcel et al., 2017). Quito’s urban area now exceeds the current  
123 Metropolitan District of Quito (DMQ) administrative boundary (Bonilla-Bedoya et al., 2020a; Salazar et al., 2021).  
124 Therefore, in this study, we define two separate areas of interest (AOIs): (1) a ‘land cover AOI’ for mapping land cover  
125 change, which encompasses the core urban area of Quito, and (2) a ‘city AOI’ for mapping greenspace, which includes the  
126 Administrative Level 3 Parishes of Quito, Cumbaya, Llano Chico, Calderon (Carapungo), Conocoto, Zambiza, and Nayo  
127 (Fig. 2a, S1).



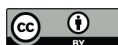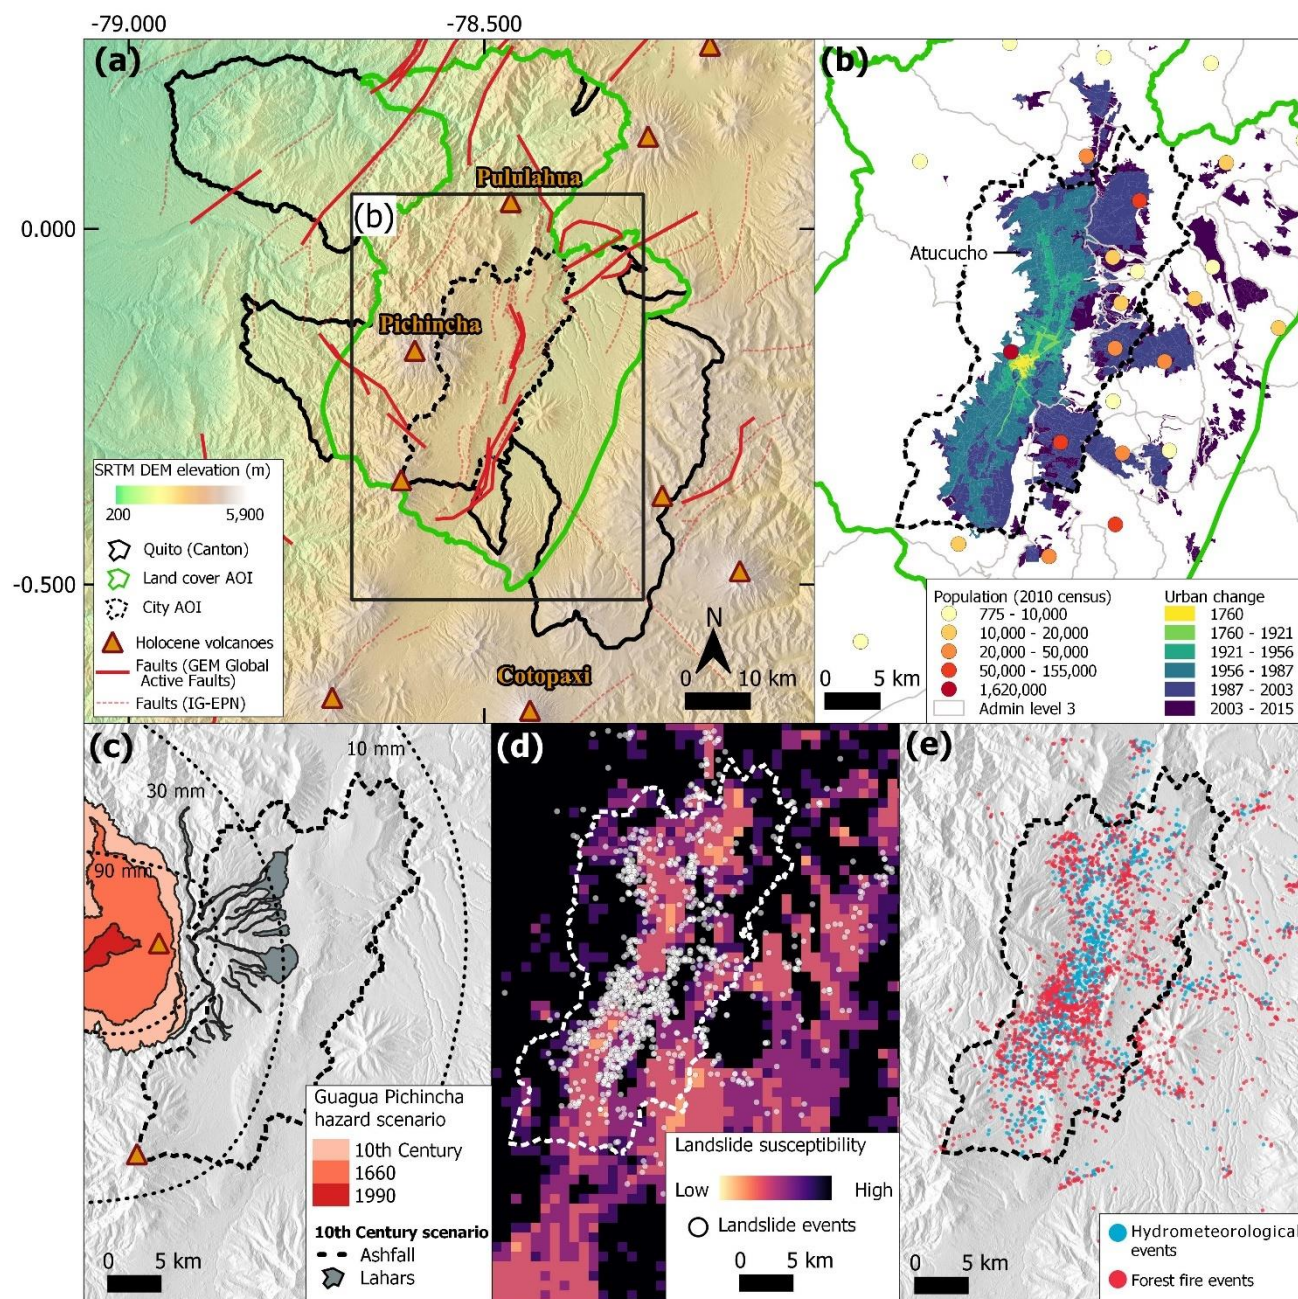

128

129

130

131

132

133

134

**Figure 2:** (a) The location of Quito, Ecuador in relation to regional seismic faults and volcanoes. Fault lines (red) are from the Geophysical Institute of the National Polytechnic School (IG-EPN) and Global Earthquake Model Global Active Faults (Styron, 2019). (b) Urban change and population of Quito are mapped using Open Government data (<http://gobiernoabierto.quito.gob.ec/>). (c) Volcanic hazards from the IG-EPN et al. (2019) Pichincha Volcano hazard map. (d) Landslide susceptibility map (Stanley and Kirschbaum, 2017) and observed landslide events (n=1,321) (2006–2017) (<http://gobiernoabierto.quito.gob.ec/>). (e) Observed Hydrometeorological (n=1,574) and forest fire events (n=2,358) (2006–2017) (<http://gobiernoabierto.quito.gob.ec/>).

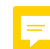

135



136 Landslides and floods are both extensive natural hazards in Quito owing to the steep topography, intense rainfall, and filling  
137 of natural drainage channels to create building space (DMQ, 2018; Castelo et al., 2018; Domínguez-Castro et al., 2018).  
138 Landslides are concentrated on the steep slopes of Quito's periphery and ravines (Fig. 2d), whereas flood events are spread  
139 across Quito's urban extent (Fig. 2e). Although less frequent, volcanic eruptions and earthquakes pose significant risk to  
140 large populations. Quito lies 12 km from the active volcano Guagua Pichincha, where activity over the past decades has been  
141 characterised by small explosions, ash and gas emission (Loughlin et al., 2015). Past eruptions have covered Quito in ash, for  
142 example, the 1660 eruption ash deposits are ~10 cm thick in central Quito (Robin et al., 2008). Recent pyroclastic flows and  
143 surges have been channelled by topography away from Quito to the west, but potential volcanic hazards in Quito include  
144 secondary lahars as well as ashfall, which are mapped using knowledge of historic eruptions (IG-EPN, 2019) (Fig. 2c).  
145 Quito's road network, and water supply, are also all vulnerable to flows and especially ash from multiple volcanoes (Wilson  
146 et al., 2012; Loughlin et al., 2015). The Global Earthquake Model estimates (Pagani et al., 2018) at the regional scale  
147 indicate a relatively high seismic hazard with a Peak Ground Acceleration (PGA) of 0.55-0.9 g (with a 10% probability of  
148 exceedance in 50 years) (Fig. S1). Similarly, Beauval (2018) estimate a PGA of ~0.4-0.6 g or Quito in a return period of 475  
149 years. The Quito Fault System creates seismic hazard across the city, with a maximum earthquake size estimated at  $M_w$  6.6  
150 and a recurrence time of ~150-435 years (Alvarado et al., 2014). Earthquake scenario damage models show that the highest  
151 rates of potential building damage are associated with areas of highest social vulnerability (Valcárcel et al., 2017). Multi-  
152 hazards or cascading hazards could emerge through combinations of single hazards, such as a volcanic eruption that deposits  
153 ash on slopes and blocks urban drains, which if followed by heavy rain could produce lahars and urban flooding respectively  
154 (Gill et al., 2021).

155  
156 In terms of policy and planning, the issue of green space in the city currently maintains a spatial-functional emphasis,  
157 although environmental (mainly related to climate change) and socio-political (public space, right to the city) criteria have  
158 been incorporated. There was an important change in the first urban plan of the city (1942), where the design envisages a  
159 series of green spaces, especially in the north of the city, under a criterion of recreational and sports spaces. This is the case  
160 of the current La Carolina park, which was initially the city's racecourse. The plan also considered a series of smaller green  
161 spaces within the residential areas. However, a balanced development between urbanisation and the environment was not  
162 planned, but rather green and open spaces in general were thought of as part of the zoning logic of the time. This model of  
163 urban development between the 1970s and 2000s is the main risk factor for disasters in the city (Carrión and Erazo Espinosa,  
164 2012). In 1993, the Metropolitan District of Quito (DMQ) was created, with 9.3% of its territory being urban and 90.7%  
165 rural. This new territorial configuration is relevant because both planning and risk analysis tend to concentrate only on the  
166 urbanised area (Peralta Arias and Higuera García, 2016).

167  
168 When outlining the vision of Quito to year 2040, the Municipality of the Metropolitan District of Quito recognised the  
169 importance of an urban green network for delivering social and natural benefits, including risk mitigation (DMQ, 2018). This



170 recognition of greenspace to reduce risk from morphoclimatic events has been present in the planning instruments of the  
171 Municipality since the 1980s. The destructive mudflows of 1983 on the slopes of Pichincha that had been previously  
172 urbanised by informal settlements prompted the national government of Ecuador to legislate for the law on “protective  
173 forests”. These forests were designed to prevent erosion, mitigate landslides, and control informal urbanisation on slopes  
174 around Quito. According to Sierra (2009), the role of greenspace in the borders of the city were first designed as recreational  
175 and patrimonial landscapes from 1940s onwards, and later, in the 1970s and 1980s incorporated environmental, city growth  
176 control, and risk mitigation properties. In the last 30 years, there has been Municipal and community interest in the recovery  
177 of ravines for recreational activities and improving citizens quality of life by implementing nature-based solutions alongside  
178 urban development; however, its realisation and impact has been small at the city scale, instead confined to planning-stage  
179 pilot projects such as in the San Enrique de Velasco district in the northwest of Quito (Salmon et al., 2021).

## 180 **3 Methodology**

### 181 **3.1 Urban growth**

182 Urban growth for the period 1986 to 2020 was derived by applying a land cover classification workflow to 30 m resolution  
183 Landsat satellite imagery (Fig. 3), including Landsat 4 Thematic Mapper (TM), Landsat 7 Enhanced Thematic Mapper Plus  
184 (ETM+), and Landsat 8 Operational Land Imager (OLI). Landsat imagery was selected June to September to avoid cloud  
185 cover during the wet season (Domínguez-Castro et al., 2018). Therefore, seasonal spectral variations in land covers are not  
186 captured. Images were pre-processed using Landsat-based detection of Trends in Disturbance and Recovery (LandTrendr)  
187 and Google Earth Engine to create multi-image mosaics with minimal cloud cover using a medoid pixel composite (Gorelick  
188 et al., 2017; Kennedy et al., 2018). Training data were manually digitised as 500 polygons (median polygon area of 5,400  
189 m<sup>2</sup>) with reference to the 1986 image using four classes: 1) urban, 2) woodland, 3) scrub vegetation and bare ground, and 4)  
190 agriculture and grassland. Training data were masked using the normalised difference vegetation index (NDVI) vegetation  
191 loss and growth masks that are output from LandTrendr to leave areas of training data that were spectrally consistent through  
192 time (1986–2020). Landsat composites were stacked with elevation and slope layers derived from the 30 m Shuttle Radar  
193 Topography Mission (SRTM) digital elevation model (DEM) (Farr et al., 2007) since these additional variables were shown  
194 to improve land cover classification performance (Zhu et al., 2016). We used a Random Forest classification, which is a  
195 decision tree approach popular for land cover classifications owing to their high accuracy, broad data handling, and low  
196 sensitivity to training data noise (Rodríguez-Galiano et al., 2012; Zhu et al., 2016). The Orfeo Toolbox Random Forest  
197 classifier (Inglada and Christophe, 2009) (Table S1) was run 50 times for each time period using 200 trees and a random  
198 sample of training data to account for imbalance between classes (Millard and Richardson, 2015) (Table S1). The modal  
199 value was used to produce the final classification map, which was accuracy assessed using an independent stratified random  
200 sample of 200 reference points in each class created using high resolution satellite imagery (Fig. S2). High resolution  
201 multispectral satellite imagery was not available in the 1980s, which reduces classification confidence in training and



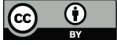

202 reference data, however, a panchromatic ~1 m resolution aerial orthophoto of Quito in 1977 from Instituto Geográfico  
 203 Militar (1977) was used for reference. The accuracy assessment was used to produce an error-adjusted area and confidence  
 204 interval of each land cover classification (e.g. Olofsson et al., 2013; Olofsson et al., 2014).

205  
 206 Future urbanisation scenarios in Quito were assessed with reference to Bonilla-Bedoya et al. (2020b) and Salazar et al.  
 207 (2020). Both studies used predictor variables to model future urbanisation scenarios in Quito. Salazar et al. (2020) present a  
 208 scenario to the year 2050, whereas Bonilla-Bedoya et al. (2020b) define an ‘urbanisation probability’ without a scenario end  
 209 date. Nonetheless, the spatial trends in both studies are similar. Predictors used to derive urbanisation probability included  
 210 biophysical (e.g. precipitation, slope, and altitude), land cover and management (e.g. protected areas), infrastructure and  
 211 services (e.g. road network), socioeconomic (e.g. land value), and landscape metrics (e.g. landscape patch size and shape)  
 212 (Bonilla-Bedoya et al., 2020). We used ‘high’ (urbanisation probability: 55–79 %) and ‘very high’ (urbanisation probability:  
 213 79–100 %) classes from Bonilla-Bedoya et al. (2020b) in this study (Fig. S3) to evaluate future land cover scenarios and the  
 214 intersection of urban areas with hazards.

215

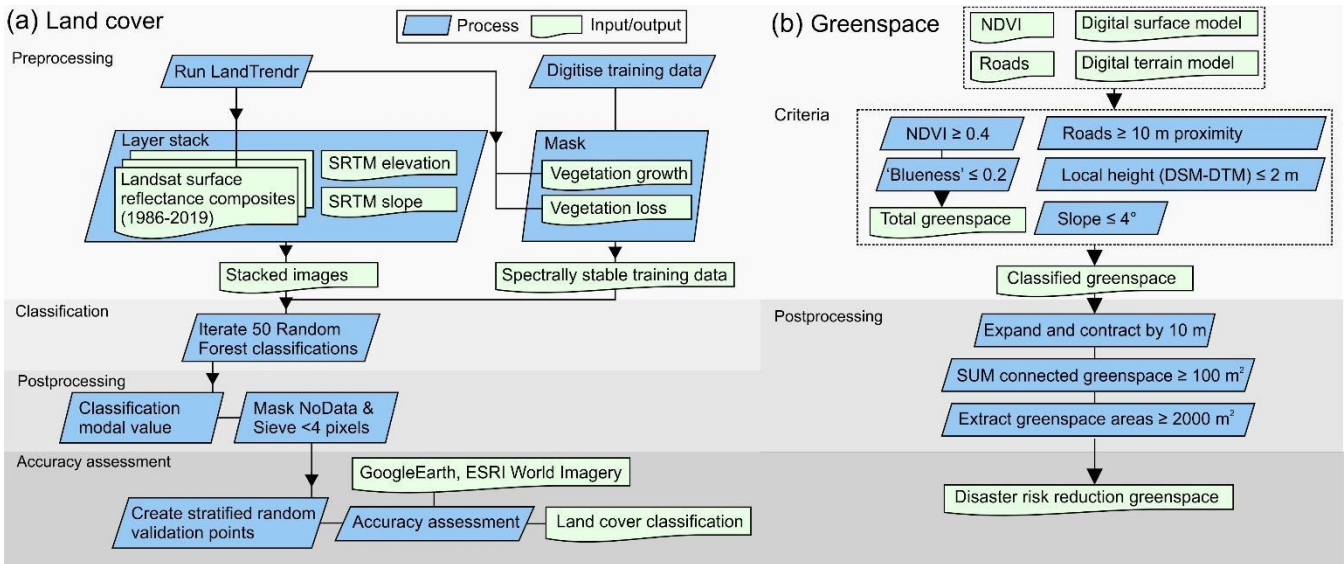

216

217 **Figure 3: (a) Land cover classification and accuracy assessment workflow. (b) Classification of greenspace that could potentially**  
 218 **contribute to disaster risk reduction (DRR), herein ‘DRR greenspace’.**

### 219 3.2 Topography

220 The 30 m SRTM DEM was used to extract statistics on the elevation and slope within the land cover change area of interest  
 221 (AOI) (Fig. 2a). A higher resolution (2 m and 10 m) DEM and orthoimagery was created for a smaller AOI (Fig. 2a), which  
 222 bounded the Administrative Level 3 Parishes of Quito, Cumbaya, Llano Chico, Calderon (Carapungo), Conocoto, Zambiza,  
 223 and Nayon. This AOI was covered by tristereo Pleiades imagery, which were acquired on five separate dates (5<sup>th</sup> November



224 2019, 28<sup>th</sup> January 2020, 9<sup>th</sup> February 2020, 6<sup>th</sup> June 2020, and 28<sup>th</sup> July 2020) in both panchromatic (~0.7 m) and multi-  
225 spectral (~2.8 m RGB and Near Infrared) modes (Table S2). Tristereoo acquisitions produce elevation models with lower  
226 uncertainties compared to bistereo acquisitions due to greater point cloud densities afforded by the extra viewing angle  
227 (Zhou et al., 2015). All imagery was delivered with radiometric processing to reflectance and supplied with rational  
228 polynomial coefficients (RPCs) (Airbus Defence and Space, 2012). Agisoft Metashape v.1.6.5 was used to process the  
229 imagery to create a DEM, digital terrain model (DTM), and orthorectified imagery. Briefly: (1) the panchromatic and  
230 multispectral imagery were aligned in one bundle to produce a sparse point cloud; (2) the sparse cloud was filtered to remove  
231 outliers using Metashape's gradual selection tools; (3) a dense point cloud was constructed using the panchromatic imagery,  
232 which was used to create a 2 m resolution DEM and (4) orthorectify the satellite imagery. Metashape's ground classification  
233 (maximum angle: 15°, maximum distance: 0.5 m, cell size: 50 m) was applied to the dense cloud and used to create the  
234 DTM. An additional DSM was output at 10 m resolution to reduce data gaps for deriving a Topographic Wetness Index  
235 (TWI) (Section 3.3).

236  
237 The accuracy of the Pleiades DEM was assessed using Ice, Cloud and land Elevation Satellite (ICESAT-2) altimetry data.  
238 ICESAT-2 data has an expected vertical accuracy that is lower than the error expected from a Pleiades DEM created without  
239 ground control points (> 3–5m) (Passalacqua et al., 2015; Markus et al., 2017) and was therefore used as an independent  
240 validation check. We extracted High Confidence returns from the Advanced Topographic Laser Altimeter System (ATLAS)  
241 instrument ATL03 Global Geolocated Photon Height data acquired 6<sup>th</sup> December 2018 to 3<sup>rd</sup> June 2020 that intersected with  
242 the Pleiades data (Neumann et al., 2019; Neumann, 2020). Photons were filtered to exclude slopes steeper than 20° and  
243 aggregated into 5 m grid cell mean values. Cells containing  $\geq 2$  photons with an elevation range  $\leq 1$  m, were carried forward  
244 for the validation ( $n = 11,922$ ). We coregistered the Pleiades DEM and gridded ICESAT-2 data following the  $x$ ,  $y$ ,  $z$  shift  
245 correction of Nuth and Kääb (2011) and the difference in elevation values were compared. The mean vertical difference  
246 between the ICESAT-2 and Pleiades data was 0.38 m (one standard deviation: 1.32 m) with a normalised median absolute  
247 deviation of 0.84 m.

### 248 3.3 Hazards

249 Information on natural hazards affecting Quito were collated from published sources and Ecuador's Open Government data.  
250 We used a global landslide susceptibility model that was validated against local and global landslide inventories, with an  
251 emphasis on rainfall-triggered events (Kirschbaum et al., 2016; Stanley and Kirschbaum, 2017). Landslide susceptibility was  
252 ranked on a scale of 1 (low) to 5 (high) and the model combined data on slope, faults, geology, forest loss, and road  
253 networks, aggregated to ~1 km grid cells (Stanley and Kirschbaum, 2017). Open Government records of 'Accidents' 2006–  
254 2017 were used to identify the geographic distribution of mass movement events ( $n = 1,321$ ), which were compared to the  
255 global landslide susceptibility model (Fig. S4) (Ministry of Territory, Habitat and Housing., 2020). We masked Class 5  
256 (high) of the landslide susceptibility model out of the future urbanisation scenario of Bonilla-Bedoya et al. (2020b) to create



257 a restricted scenario of urban growth, which reflects DMQ's vision to remove high risk areas from future land occupation.  
258 We also excluded development on the slopes of Pichincha volcano (as unrealistically inaccessible given steep slopes) and  
259 included an area of development spanning the Metropolitan District boundary in the south (Fig. S3). We refer to the original  
260 scenario of future urbanisation and the modified scenario as F-U and M-U respectively. Information on volcanic hazards  
261 were obtained from the Geophysical Institute of the National Polytechnic School (IG-EPN) through the National Information  
262 System (SNI) (SNI, 2020). Spatial variation in earthquake hazard across Quito was not explored in this study due to the  
263 coarse resolution (~10 km) of available hazard information (Fig. S1). However, the high regional seismic hazard (Alvarado  
264 et al., 2014; Pagani et al., 2018) motivates our city-wide analysis of greenspace.

265  
266 The 10 m Pleiades DEM was hydrologically corrected by breaching sinks (Lidberg et al., 2017), using the *Breach*  
267 *depressions least cost tool* of Whitebox 1.4.0. The breached DEM was used to derive a TWI, which was intersected with  
268 flood events in the Open Government database (n = 1,274) to assess whether high TWI values correspond to greater  
269 incidences of flood events, and therefore was indicative of potential flood hazard (Jalayer et al., 2014; Kelleher and  
270 McPhillips, 2020).

$$272 \quad TWI = \ln\left(\frac{a}{\tan\beta}\right) \quad (1)$$

273  
274  
275 where  $a$  represents the specific catchment area and  $\tan\beta$  represents the local DEM slope. Therefore, the TWI describes the  
276 tendency for a cell to accumulate and evacuate water (Beven and Kirkby, 1979; Manfreda et al., 2011; Mattivi et al., 2019).  
277 We assumed a positional uncertainty radius of 20 m in the flood event records based on the observed positional spread of  
278 recorded traffic collisions at road junctions in the same database (Fig. S5). The maximum TWI value within a 20 m radius of  
279 the recorded point was extracted and compared to the TWI for a random sample of 10,000 points to test whether there was a  
280 statistically significant difference in the TWI at locations of flood events (e.g. Kelleher and McPhillips, 2020).

### 281 3.4 Greenspace

282 Orthorectified multi-spectral Pleiades imagery was pansharpened in ArcGIS Pro 2.6.0 using the Gram-Schmidt algorithm  
283 and Pleiades sensor band weights to create a four-band (red, green, blue, and near infrared (NIR)) 0.5 m resolution multi-  
284 spectral image. Quito's vegetated greenspace distribution was mapped using the NDVI applied to the NIR and red bands of  
285 the pansharpened Pleiades satellite imagery (Fig. 3b):

$$287 \quad NDVI = \frac{(NIR - Red)}{(NIR + Red)} \quad (2)$$





288 Negative NDVI values correspond to areas lacking vegetation, whereas increasingly positive values represent healthy  
289 vegetation (Tucker et al., 1981; Pettorelli et al., 2005). Bright blue roofs also displayed a high NDVI value and were masked  
290 out using a simple ‘blueness’ index of values  $\leq 0.2$ , which was derived through manual inspection of blue roofs:

291

$$292 \quad \textit{Blueness} = 2 \times \textit{Blue} - \textit{Red} - \textit{Green} \quad (3)$$

293

294 Whilst global coverage and daily observation is possible with the paired constellation, Pleiades imagery is not routinely  
295 acquired nor open access. Therefore, we also compared Pleiades NDVI values with those from an open access Sentinel-2  
296 image acquired 6<sup>th</sup> February 2020 with the aim of testing their consistency, noting that whilst the spectral bands overlap, the  
297 bandwidth of Pleiades is greater (Pleiades: red 590–710 nm, NIR 740–940 nm, Sentinel-2: red 649–680 nm, NIR 780–886  
298 nm).

### 299 **3.4.1 Disaster risk reduction (DRR) greenspace**

300 Greenspaces potentially suitable for providing safe spaces and contributing towards disaster risk reduction were identified  
301 using an EO-based workflow (Fig.3b) for areas within 800 m (accessible within a ~10-minute walk) (e.g. Dou and Zhan,  
302 2011; Jeong et al., 2021) of populations in Quito’s urban extent. The workflow identified greenspace: (1) that is vegetated,  
303 (2) greater than 10 m from a road to exclude road verges; (3) with slope  $\leq 4^\circ$  to provide a suitable gradient for ‘safe spaces’  
304 (Kılıcı et al., 2015; Liu et al., 2011); and (4) with a local height ( $\leq 2$  m) to identify open ground and exclude raised vegetation  
305 such as trees. Expansion and contraction buffers of 10 m were applied to connect adjacent patches of greenspace into  
306 greenspace ‘zones’, which for example could represent multiple patches of classified greenspace within a park. All areas of  
307 greenspace with a patch size  $\geq 100$  m<sup>2</sup> within these zones were summed and zones totalling  $\geq 2000$  m<sup>2</sup> of greenspace were  
308 classified as ‘potential DRR greenspace’. Space requirements in a disaster situation are dynamic; however, a 100 m<sup>2</sup> patch  
309 size is recommended to accommodate two people with communal space (cooking, access, facilities etc) in a camp-style  
310 settlement following guidelines in the Sphere Humanitarian Charter and Minimum Standards in Humanitarian Response  
311 Handbook (Anhorn and Khazai, 2015; Sphere Association, 2018). Zones of 2000 m<sup>2</sup> approximate one quarter to one third of  
312 a professional football pitch so could be expected to already exist as functional greenspaces (e.g. recreation parks) in an  
313 urban environment. These spaces were evaluated alongside a list of safe spaces designated by DMQ for use in an earthquake  
314 event (Metro Ecuador, 2019)(Table S3), in conjunction with population data projected to 2019 and socioeconomic  
315 classification data (Instituto Geográfico Militar, 2019). These socioeconomic classes characterise a continuum of education,  
316 income, and lifestyle factors into five classes, ranging from ‘high’ to ‘low’, where ‘low’ represents basic education and  
317 limited household facilities such as rubbish collection and plumbing, whereas ‘high’ represents higher education, and houses  
318 or apartments that are provisioned with state services (Instituto Geográfico Militar, 2019).



### 319 **3.4.2 Greenspace capacity**

320 Quito's 2019 population data (Instituto Geográfico Militar, 2019) were used to assess the population capacity of all DRR  
321 greenspace (3.4.1) in the event that they were to be used for accommodation following a disaster such as an earthquake. We  
322 assessed the capacity of two types of greenspaces: (1) DRR greenspace that overlapped with DMQ designated greenspaces,  
323 which included city parks and safe spaces (3.4.1), and (2) all DRR greenspaces identified in this study that were either  
324 designated or undesignated. These two scenarios therefore represent the DRR capacity based on current designations (1),  
325 compared to the potential maximum capacity (2). We considered two separate cases of populations within 800 m and 1600 m  
326 network buffers of each greenspace. For each scenario, we used a network analysis to assign population demand points to  
327 each greenspace based on their proximity, up to the maximum buffer distance. The network was constructed as a grid at 100  
328 m resolution and considered population demand points also gridded at 100 m resolution, which were uniformly  
329 disaggregated from census polygons. The number of people that could be accommodated in each greenspace depends on the  
330 capacity of the space, and the population demand in the surrounding buffer. We considered capacities based on Sphere  
331 Association (2018) guidelines, which suggest an allocation of 45 m<sup>2</sup> per person (recommended amount per person  
332 accounting for communal facilities and infrastructure in an emergency shelter setting) and 3 m<sup>2</sup> per person (minimum living  
333 space per person). All demand within the buffers was allocated to the closest greenspaces, therefore excess demand was  
334 reported as overcapacity. We did not consider the possibility of people moving greater distances around the city to distribute  
335 the population demand more equally, which could occur following an initial disaster situation, or that only a fraction of the  
336 population would require access to refuge space in a disaster situation. Considering potential policy consideration, we also  
337 used a maximum capacitated coverage network analysis (e.g. Anhorn and Khazai, 2015) with the same datasets to find the  
338 'top ten' DRR greenspaces in Quito based on a minimum space requirement of 3 m<sup>2</sup> per person.

## 339 **4 Results**

### 340 **4.1 Urban growth**

341 Our land cover classifications showed that the urban area of Quito expanded ~192 km<sup>2</sup> over the study period, more than  
342 doubling from 160±50 km<sup>2</sup> in 1986 to 352±47 km<sup>2</sup> in 2020 (Fig. 4, Table S4). Urban expansion was primarily aligned along-  
343 valley (north south) and eastward (Fig. 5a), into areas of previously scrub vegetation/bare and agricultural/grassland classes.  
344 The future urbanisation scenario of Bonilla-Bedoya et al. (2020b) covered an urban area of 1,232 km<sup>2</sup> (F-U), whereas the M-  
345 U scenario covered 705 km<sup>2</sup> (Fig. 4a), which was still double the observed 2020 urban area. Future urbanisation in the  
346 modelled scenarios was predominantly eastward, where lower density urbanisation interspersed with the scrub  
347 vegetation/bare ground class was already apparent in 2020 (Fig. 5). The area of woodland and agriculture/grassland classes  
348 also increased 1986–2020. A notable example of afforestation (4.8 km<sup>2</sup>) was the park Metropolitano del Sur, which is  
349 located on the southeast of the city limit (Fig. 5a).

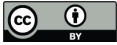

350

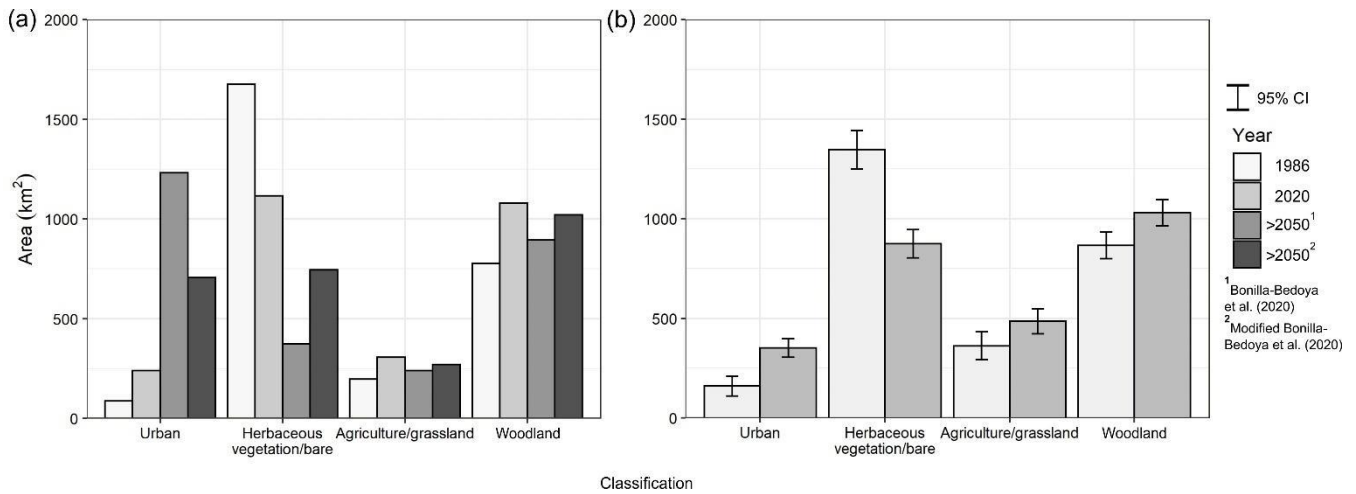

351

352 **Figure 4: (a) Mapped land cover classification results for 1986 and 2020 alongside modelled future land cover from two scenarios<sup>(1, 2)</sup>**  
 353 **using data from Bonilla-Bedoya et al. (2020). (b) Error-adjusted (e.g. Olofsson et al., 2013; Olofsson et al., 2014) land cover**  
 354 **classification results from 1986 and 2020.**

355

356

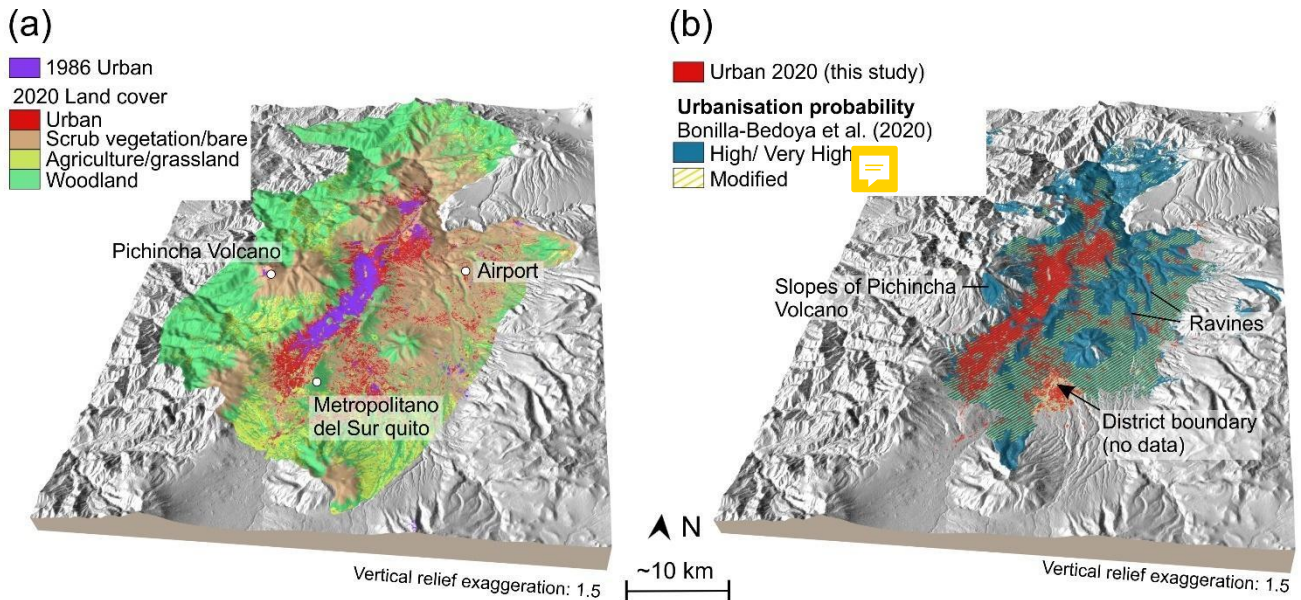

361

362 The median elevation of Quito’s urban extent in 2020 (2,780 m) was similar to 1986 (2,810 m); however, the city covered a  
 broader elevation range in 2020, tending towards lower elevations (Fig. 6a), which was also apparent for the F-U and M-U

361

362





363 scenarios. The urban class displayed the smallest spread of values for topographic slope (Fig. 6b). Here, the median slope of  
 364 the urban class was  $\sim 5^\circ$  in 1986 and 2020, however this increased to  $11^\circ$  and  $7^\circ$  in the F-U and M-U scenarios respectively,  
 365 in addition to a broader spread of slope values. Woodland featured the highest median slope of all land cover classes ( $\sim 28^\circ$ )  
 366 and a comparable median elevation to the urban class ( $\sim 2700\text{--}2800$  m).  
 367

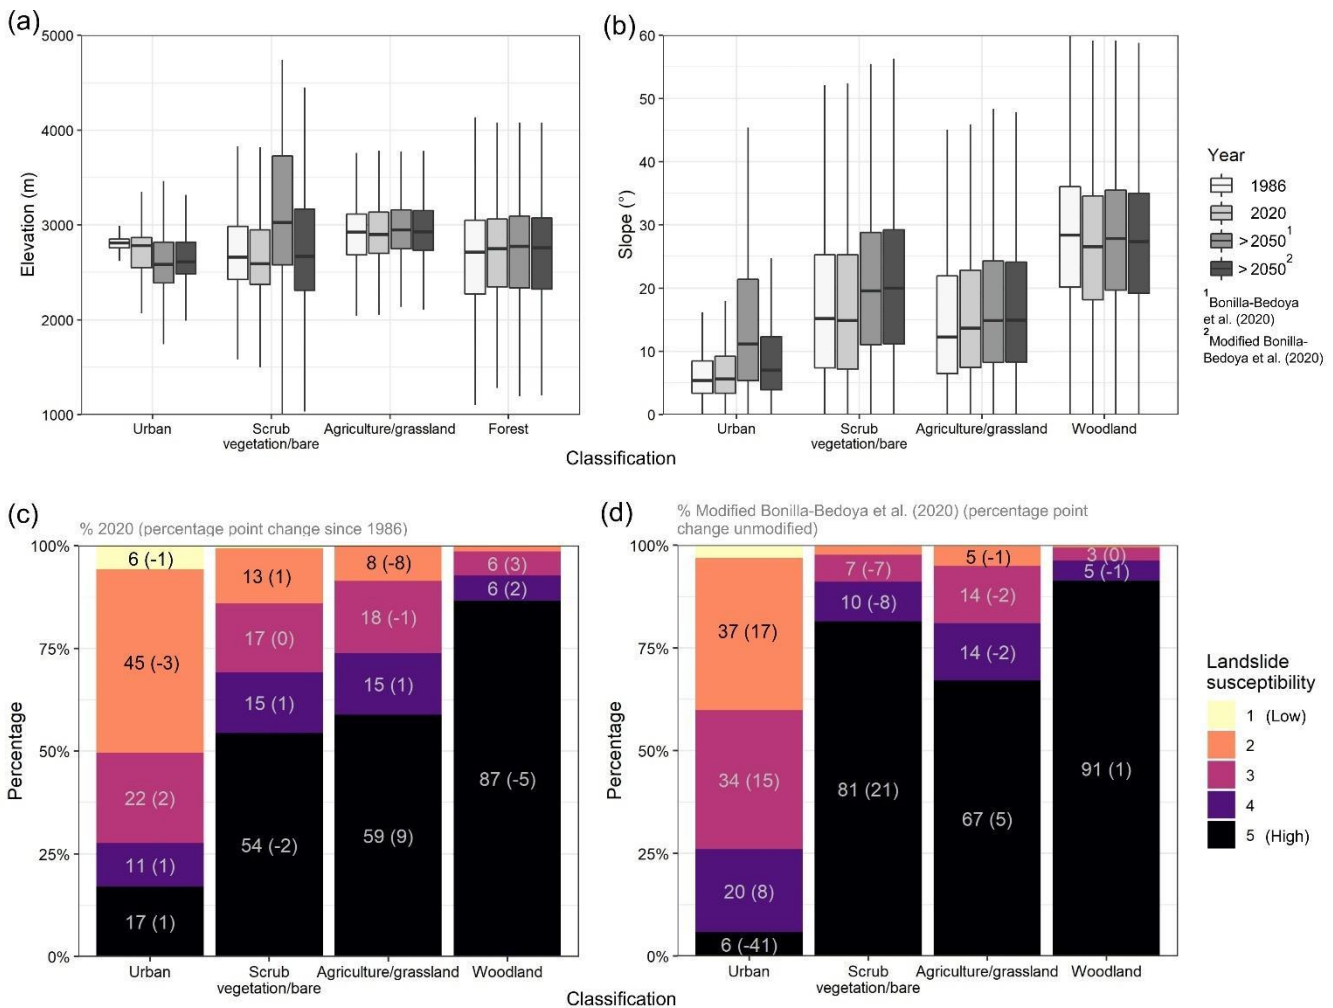

368  
 369 **Figure 6: Elevation (a) and slope (b) characteristics of the classified and modelled land cover scenarios. Boxes show the**  
 370 **interquartile range and the median (horizontal line). Lines show values within 1.5 times the interquartile range. Outliers are not**  
 371 **shown. (c) 2020 land cover intersections with landslide susceptibility and the percentage points change since 1986. (d) Future land**  
 372 **cover intersections with landslide susceptibility using modified urbanisation probability (M-U) of Bonilla-Bedoya et al. (2020, and**  
 373 **the difference compared to the unmodified scenario (F-U).**



## 374 4.2 Intersection with hazards

375 Landslides are one of the most common natural hazards in Quito (DMQ, 2018). We found good spatial association between  
376 observations of landslide events in Ecuador's Open Government database (2006–2017) and a landslide susceptibility model  
377 (Stanley and Kirschbaum, 2017) (Fig. S4). Of 1,321 recorded events, 82% ( $n = 1,089$ ) fell within landslide susceptibility  
378 categories 3–5, of which 44% ( $n = 576$ ) were in the highest category (5). Ten events were observed in the lowest category  
379 (1). We observed a small change in the landslide susceptibility of the urban class 1986–2020. Here, the urban area in the  
380 highest landslide susceptibility categories (4 and 5) increased by 2 percentage points 1986–2020 (Fig. 6c). The largest  
381 change was observed in the agriculture/grassland class, which featured a 9-percentage point increase in category 5 (high)  
382 landslide susceptibility. Woodland mostly occurred within the highest landslide susceptibility category 5 (87%) (Fig 6c).  
383 Regarding future urbanisation, the M-U scenario restricted future urbanisation in landslide susceptibility category 5,  
384 therefore the observed percentage of urban area in category 5 (6%) was notably lower than in the F-U scenario (47%), which  
385 did not enforce any restrictions.

386

387 Flood events in Quito that were recorded in Ecuador's Open Government database were evaluated alongside a TWI derived  
388 from the 10 m resolution Pleiades DEM. Median TWI values for all flood events ( $n = 1,274$ ), clustered flood events where  
389 two or more events were located within 40 m of each other ( $n = 125$ ), and a random sample ( $n = 10,000$ ), were 13.3, 14.4,  
390 and 12.1 respectively (Fig. S6). Clustered flood events, which displayed the highest TWI, could correspond to areas of  
391 nuisance flooding since multiple events are located in close proximity (Kelleher and McPhillips, 2020). Two sample  
392 independent Welch t-tests (one-tailed) showed that the difference in TWI values between all flood events and clustered  
393 floods events were statistically significantly different from the random sample ( $p < 0.05$ ). Therefore, the mean TWI value  
394 was observed to be larger in areas of flood locations compared to the random sample.

## 395 4.3 Greenspace

396 Quito includes multiple types of greenspace that provide ecological, social, and disaster risk reduction benefits (Fig. 1, 7).  
397 Within our AOI, 18.6 km<sup>2</sup> of potential DRR greenspace was identified, which covered 6% of the urban zone (Fig. 8). DMQ  
398 designated greenspace had an area of 36.9 km<sup>2</sup>, of which 2.5 km<sup>2</sup> (7%) intersected with potential DRR greenspace. Similarly,  
399 DMQ designated safe spaces covered 17.3 km<sup>2</sup>, of which 1.7 km<sup>2</sup> (10%) intersected with potential DRR greenspace.  
400 Comparing DRR greenspaces with hazard information revealed that 62% of DRR greenspace intersected with areas of high  
401 TWI values ( $\geq 14.4$  (median value for clustered flood events - Section 4.2)), 10% intersected with areas of high (category 5)  
402 landslide susceptibility, and 6% intersected with both hazards (Fig. 8b).

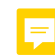

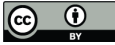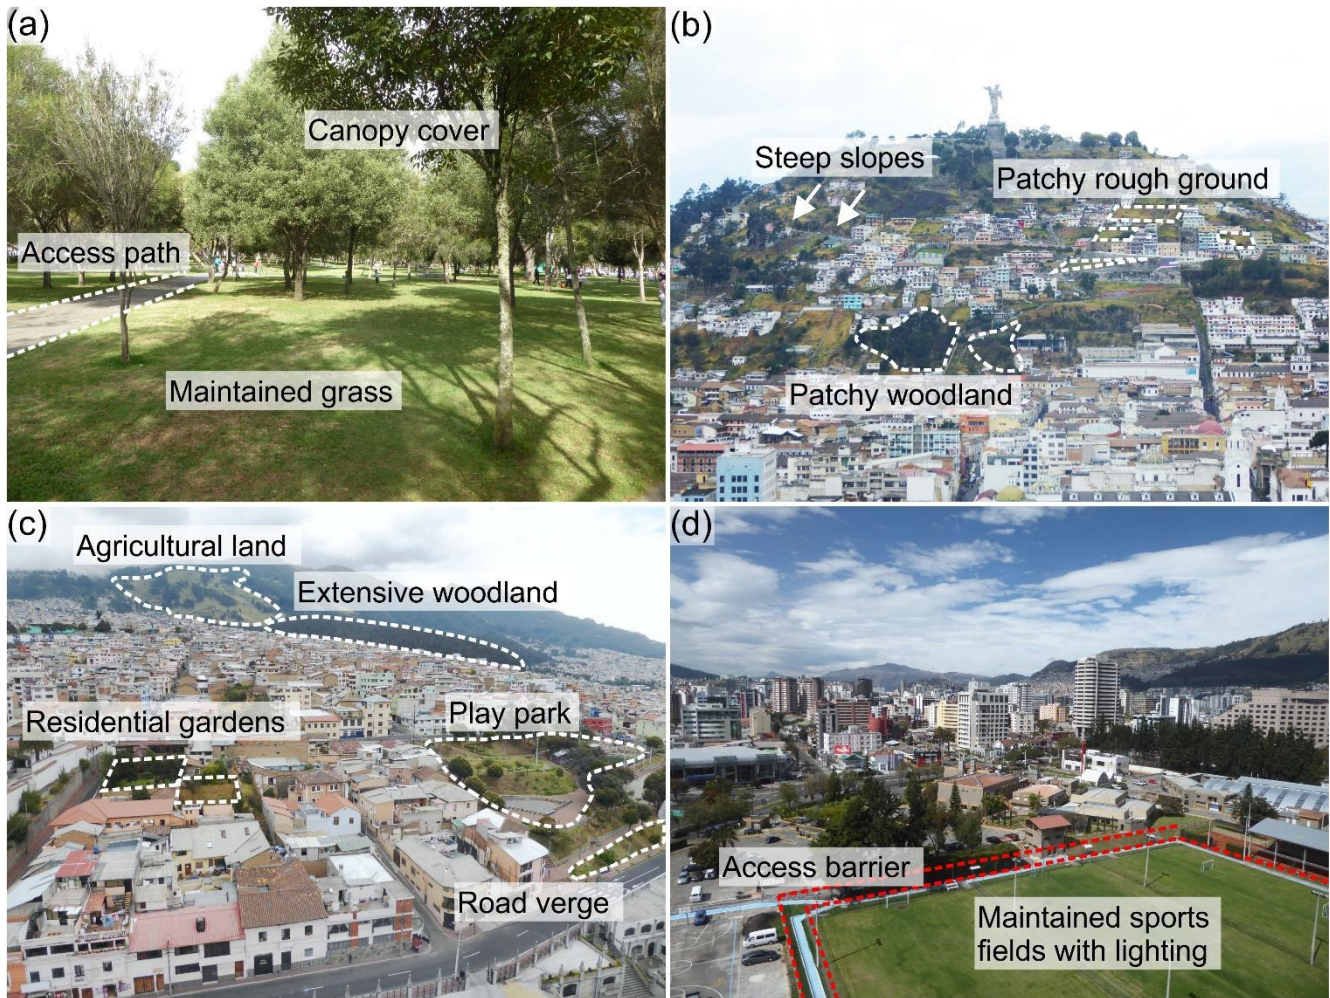

403

404

Figure 7: Examples of greenspace in Quito from photographs taken in October 2019 (a–d).



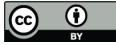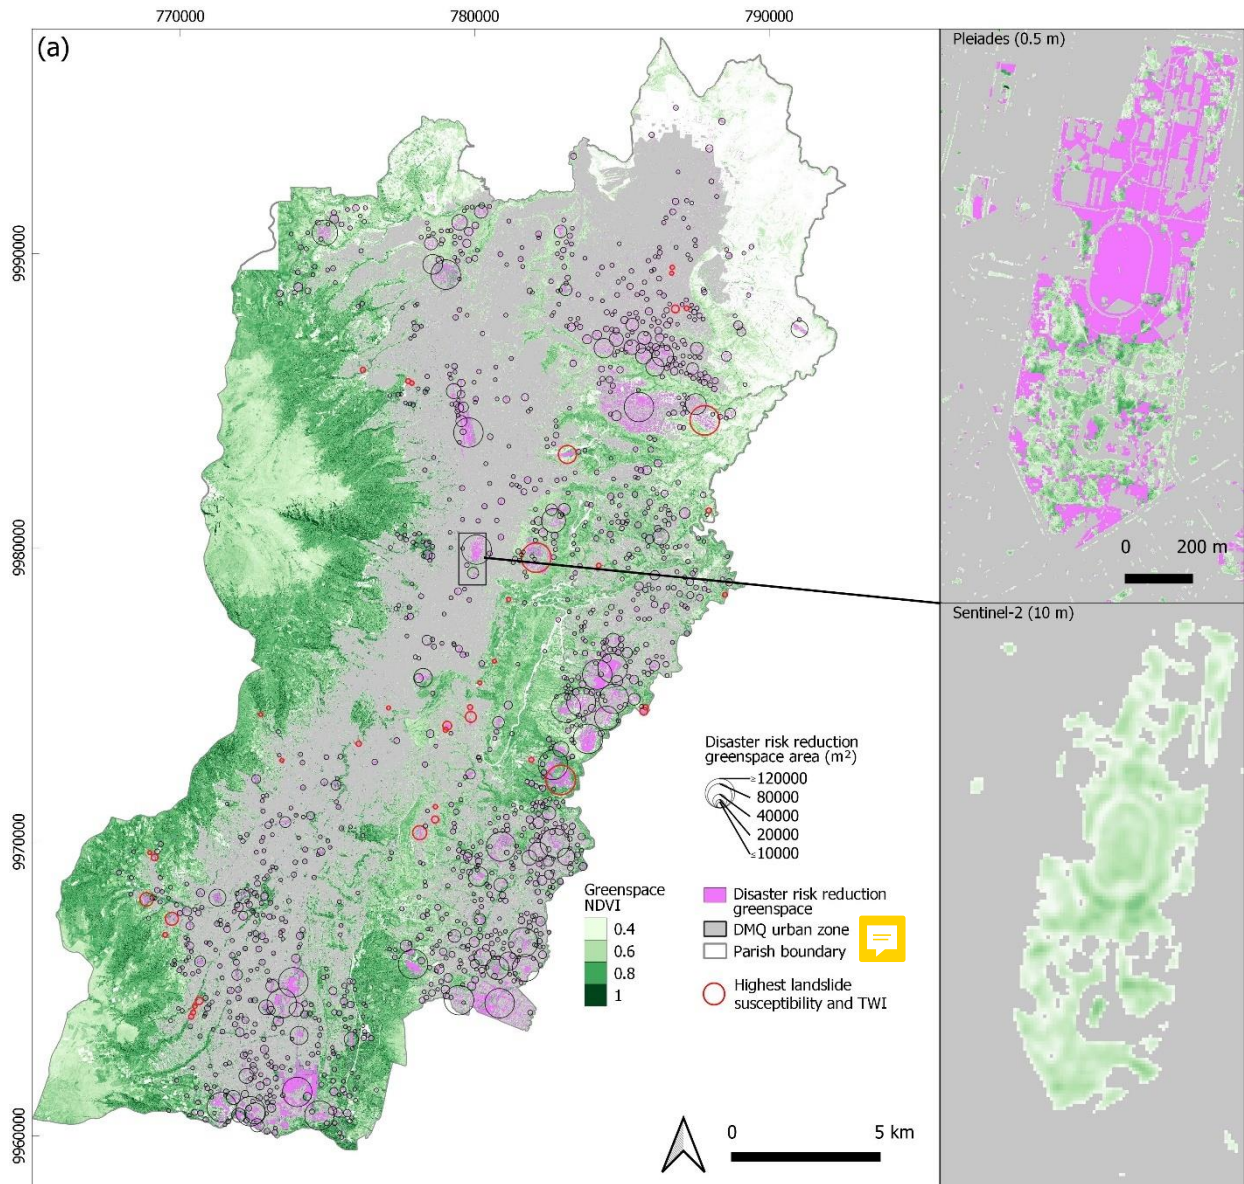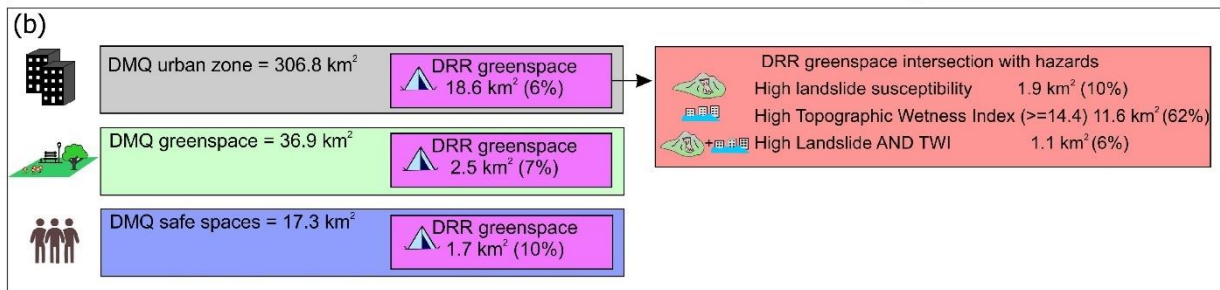



406 **Figure 8: Greenspace mapped using the NDVI applied to Pleiades satellite imagery shown with classified potential DRR**  
407 **greenspace (black and red circles, pink shading). Red circles indicate DRR greenspace that intersects with landslide susceptibility**  
408 **class 5 (high) and a Topographic Wetness Index value of  $\geq 14.4$  (median value for clustered flood events - Section 4.2). The inset of**  
409 **Carolina Park shows the similarity of Pleiades-derived greenspace compared to greenspace mapped using Sentinel-2 imagery. The**  
410 **Pleiades inset shows the distribution of potential DRR greenspace (pink) in Carolina Park. (b) Summary of greenspace availability**  
411 **and hazard intersections.**

412 The association between population, socioeconomic classification (Instituto Geográfico Militar, 2019), and greenspace  
413 accessibility was investigated for greenspaces  $\geq 2000$  m<sup>2</sup>. The number of people living within close proximity to designated  
414 greenspace was higher than for DRR greenspace (Fig. 9a). For example, 2.3 million (98%) of Quito's population were within  
415 800 m of a designated greenspace, compared to 2.1 million for the DRR greenspace (88%). Distance to the nearest  
416 greenspace was greater for 'low' and 'medium low' socioeconomic classifications compared to 'high' and 'medium high'  
417 (Fig. 9b). Here, the difference in median values was greatest for designated greenspace (466 m), compared to our  
418 classification of DRR greenspace (80 m). The amount of designated greenspace per person was smaller for lower  
419 socioeconomic classifications, with a median of 3 m<sup>2</sup> per person for the 'low' classification compared to 8 m<sup>2</sup> for 'high'.  
420 However, the amount of DRR greenspace was greatest for lower socioeconomic classifications, with a median of 24 m<sup>2</sup> per  
421 person for 'low' compared to 4 m<sup>2</sup> for 'high' (Fig. 9c). This reflects lower population densities on the city margins (Fig. 9d)  
422 and the persistence of agricultural land and undeveloped ground in these areas following urbanisation.

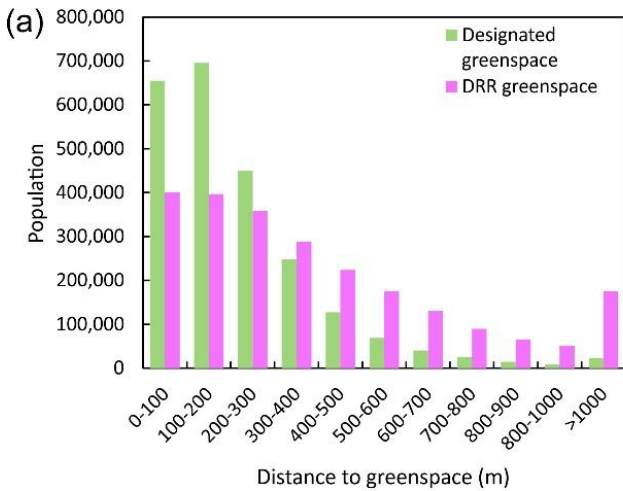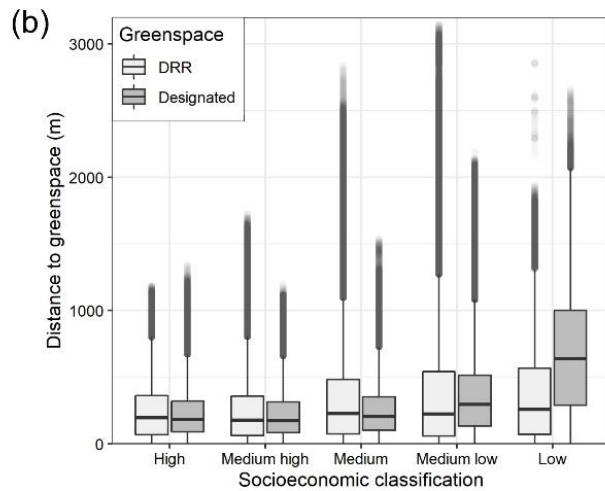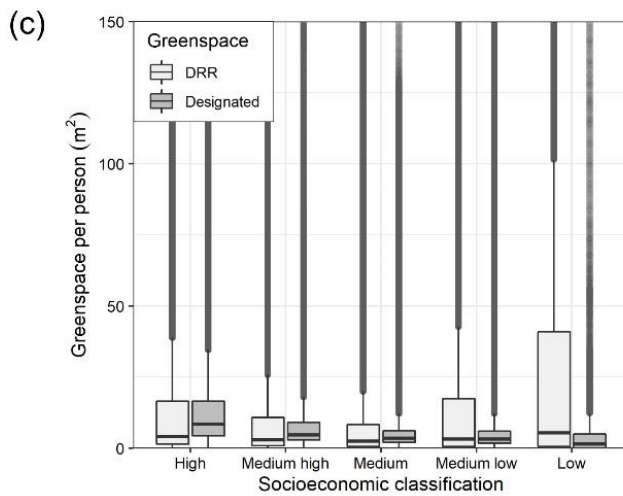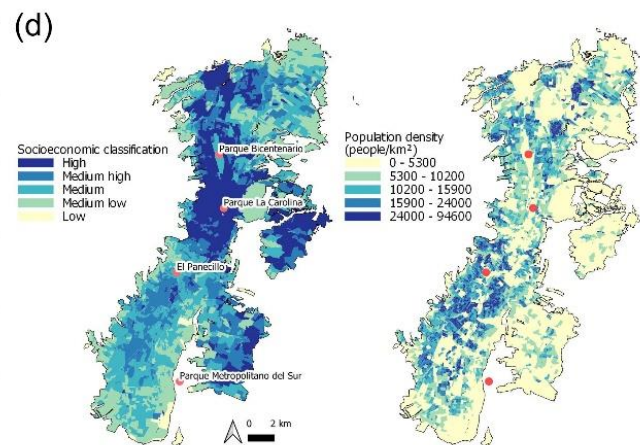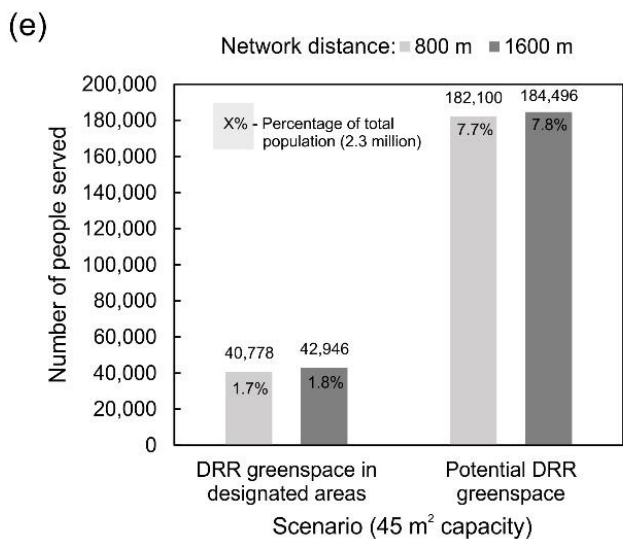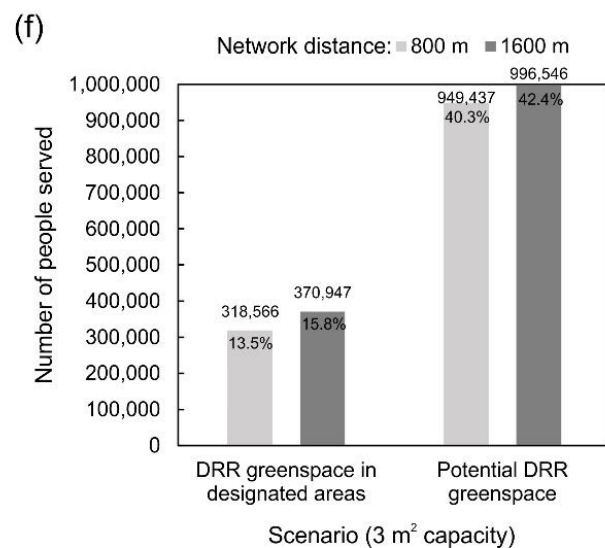





424 **Figure 9: (a) Population proximity to designated and DRR greenspace. (b) Distance to the nearest greenspace for each**  
 425 **socioeconomic classification. Boxes show the interquartile range and the median (horizontal line). Lines show values within 1.5**  
 426 **times the interquartile range. Outliers are shown as black markers with transparency. Outliers beyond the y-axis range (c) were**  
 427 **excluded. (c) Greenspace per person within 800 m for each socioeconomic classification. (d) Spatial variation in socioeconomic**  
 428 **classification and population density for Quito using data from Instituto Geográfico Militar (2019). (e) Number of people that**  
 429 **could be accommodated in DRR greenspace based on an allocation of 45 m<sup>2</sup> per person capacity and (f) 3 m<sup>2</sup> per person capacity.**  
 430 **(e-f) Show capacitated populations for a network distance of 800 m (light grey bars) and 1600 m (dark grey bars) from the**  
 431 **greenspace centroid and for DRR greenspace in designated spaces compared to all potential DRR greenspace mapped in this**  
 432 **study.**

### 433 4.3.1 Greenspace capacity

434 We assessed the capacity of each space considering the surrounding population demand. For populations within 800 m, DRR  
 435 greenspace in currently designated areas could accommodate 1.7% (40,778) of Quito's population (total 2.3 million) with an  
 436 allocation of 45 m<sup>2</sup> per person, or 13.5% (318,556) with 3 m<sup>2</sup> per person (Fig. 9 e-f, 10a). Considering all potential DRR  
 437 greenspace (Fig. 8a), these values are 7.7% and 40.3% respectively (Fig. 9e-f). The top ten DRR providing greenspaces are  
 438 shown in Figure 10b and Figure 11. Eight of these spaces overlap fully or partially with currently designated greenspaces or  
 439 safe spaces and two did not (Fig. 11). Of these 278 currently designated spaces, only 10 were not over capacity based on the  
 440 population demand (Fig. 10b).

441

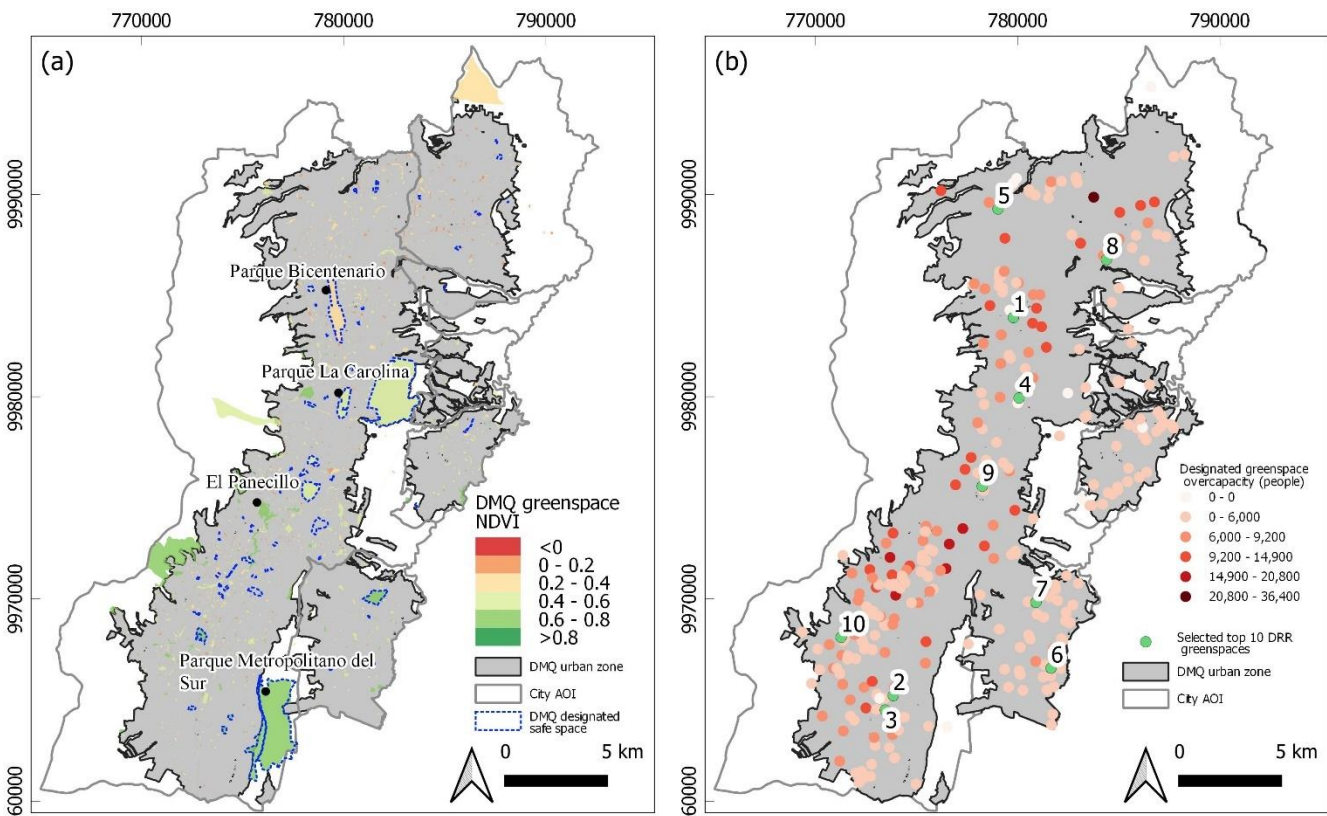

442

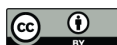

443 **Figure 10: (a) Designated green areas and safe spaces (blue dashed polygons) from Open Government data and their mean NDVI**  
 444 **extracted using Pleiades satellite data. (b) Overcapacity of DRR greenspace in currently designated greenspaces or safe spaces.**  
 445 **Green markers show the top 10 DRR greenspaces based on a maximum capacitated coverage model.**  
 446

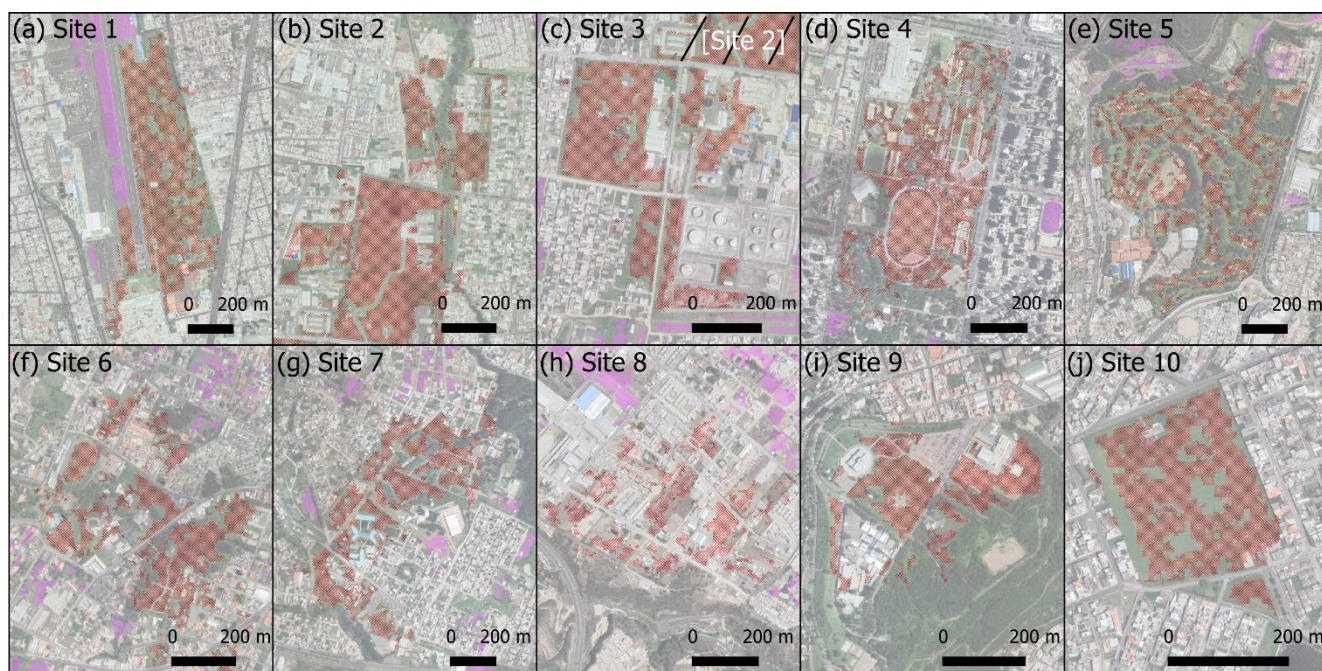

Background imagery © Google Earth 2022

 DRR greenspace site  
 Other DRR greenspace

Site locations (designated greenspace/safespace (Y-Yes/N-No/ P-Partially)

|                                                          |                                                                |
|----------------------------------------------------------|----------------------------------------------------------------|
| Site 1 (Parque Bicentenario): -78.4864,-0.1454 (Y)       | Site 6 (Parque Recreacional La Moya): -78.4697,-0.3020 (P)     |
| Site 2 (Unknown grassland): -78.5397,-0.3143 (P)         | Site 7 (Parque Metropolitano La Armenia): -78.4764,-0.2726 (P) |
| Site 3 (Unknown grazing grassland): -78.5432,-0.3208 (N) | Site 8 (El Carmen): -78.4451,-0.1194 (P)                       |
| Site 4 (Parque La Carolina): -78.4839,-0.1813 (Y)        | Site 9 (Parque Itchimbia): -78.5002,-0.2207 (Y)                |
| Site 5 (Quito Tennis y Golf Club): -78.4932,-0.0968 (N)  | Site 10 (Unknown grazing grassland): -78.5629,-0.2883 (P)      |

447 **Figure 11. Top ten ranked DRR greenspaces (red) and other nearby DRR greenspaces (pink).**  
 448

## 449 5 Discussion

### 450 5.1 Urban growth and hazard intersections

451 Quito's historical urban expansion is largely aligned north-south, whereas future urban expansion is focussed to the north  
 452 and east (Fig.5). Our study captures a period of land occupations starting in the 1980s including the settlement of Atucucho  
 453 (Fig. 2b), which formed informally in 1988 (Testori, 2016). This occupation is visible in our land cover classification (Fig.  
 454 5a). The formation date is 2003 in Open Government data (Fig. 2b), which likely reflects its origins as an informal  
 455 settlement. In this case, satellite imagery can capture the spatial of a city, including occupations that may not be apparent in  
 456 historical maps. However, image classification methods usually only capture 2D sprawl, and not vertical high-rise



457 developments or redevelopments that are important for measuring exposure to natural hazards (e.g. Amey et al., 2021).  
458 Quito's past and projected urban growth has been studied by several authors in recent years (e.g. Bonilla-Bedoya et al.,  
459 2020b; Salazar et al., 2020; Valencia et al., 2020). Cross-comparisons are complicated by the use of different study areas  
460 since Quito's urban area now exceeds the designated metropolitan district boundary, which has prompted investigations to  
461 create a new district area (Salazar et al., 2021). By comparing our urban classification (year 2020) to that of Bonilla-Bedoya  
462 et al. (2020) (year 2016) within the same area of interest, we find urban areas of 213 km<sup>2</sup> and 210 km<sup>2</sup> respectively, which  
463 indicates classification consistency using EO data despite different methodological approaches.

464  
465 Limited urban expansion to the east of Quito on the steep slopes of Pichincha volcano suggests that a programme of  
466 protection to avoid encroachment is working (Vidal et al. 2015). However, several of these areas or their vicinities are  
467 inhabited because of previous land invasion dynamics that affected the peripheral green belt. They can be characterised from  
468 a spatial and socioeconomic approach as a homogeneous space, in which the less economically favoured classes experience  
469 greater possibilities of isolation from other social groups (Bonilla-Bedoya et al., 2020a). Further limiting eastward urban  
470 growth reduces the ashfall and lahar hazard in the event of an eruption (Fig. 2c) and the hazard posed by landslides (Fig. 2d).  
471 Additionally, the predominantly woodland slopes east of Quito (Fig. 5a) featured the highest landslide susceptibility scores  
472 (87% of woodland is in class 5 (High) (Fig. 6c)) and are therefore a valuable target for protection against urbanisation. Our  
473 observed decreasing elevation trend of Quito's urban area (Fig. 6a) reflects north-south and eastward expansion into lower  
474 lying flatter areas, such that at a city-scale, Quito's landslide susceptibility did not notably increase 1986–2020 (Fig. 6c).  
475 These areas are also the location of projected future expansion (Bonilla-Bedoya et al., 2020b; Salazar et al., 2020; Valencia  
476 et al., 2020), predominantly through conversion of scrub vegetation and bare ground (Fig. 5a). Notable ravines exist in these  
477 areas, therefore risk-informed planning to reduce encroachment on steep slopes, which was reflected in our M-U future  
478 urban scenario, is desirable to minimise landslide risk to future developments. These areas are also likely to be most  
479 susceptible to multi-hazards such as rainfall triggered lahar remobilisation or landslides, and flood and earthquake triggered  
480 landslides (Gill and Malamud, 2017). Similarly, the filling of ravines from the seventeenth century onwards restricts the  
481 drainage capacity during intensive rainfall and increases flood risk (Aragundi et al., 2016), therefore, incorporating  
482 additional DRR greenspaces here to attenuate runoff and store water could be beneficial.

483  
484 While risk-informed urbanisation can mitigate some hazards such as landslides, an intensive earthquake hazard exists in  
485 Quito (Fig. S1), such that urban risk reduction requires building resilience at community to city-wide levels (Alvarado et al.,  
486 2014; Valcárcel et al., 2017). A key element of resilience is the access to 'safe spaces' following an earthquake event where  
487 communities can avoid damaged buildings and infrastructure and receive emergency aid (Sphere Association, 2018). These  
488 spaces are increasingly viewed within a broader network of benefits to society and ecosystems (e.g. Fig.1a), and framed  
489 within Eco-DRR strategies (UNDRR, 2020). We therefore evaluated greenspaces in Quito that could offer DRR capabilities  
490 by both considering existing designated greenspaces and assessing other non-designated greenspaces.





491 **5.2 Greenspace**

492 Our study was designed to identify the basic requirements for sites that could be designated or developed as DRR greenspace  
493 using an earth-observation based methodology that could be adapted and applied to other cities. This is timely since  
494 greenspace is becoming increasingly desirable to improve environment quality, contribute to addressing climate breakdown,  
495 and greenspace within Eco-DRR strategies can simultaneously mitigate against multiple hazards (Onuma and Tsuge, 2018;  
496 McVittie et al., 2018; Sudmeier-Rieux et al., 2021). Our DRR greenspace primarily addresses the basic requirements of  
497 people-space and amenable topography for medium- to long-term accommodation requirements, such as following a major  
498 earthquake. Examples are shown in Figure 12 for areas in central Quito and on the periphery. Regarding urban risk, green  
499 space in Quito has been thought of from the perspective of threat. For example, interventions have been developed on the  
500 slopes of Pichincha from a logic of risk mitigation (Vidal et al., 2015). Recently, after the 2016 Ecuador earthquake, green  
501 and open spaces were incorporated throughout the city as safe points in case of evacuation (Rebotier, 2016) (Fig. 10a).

502



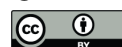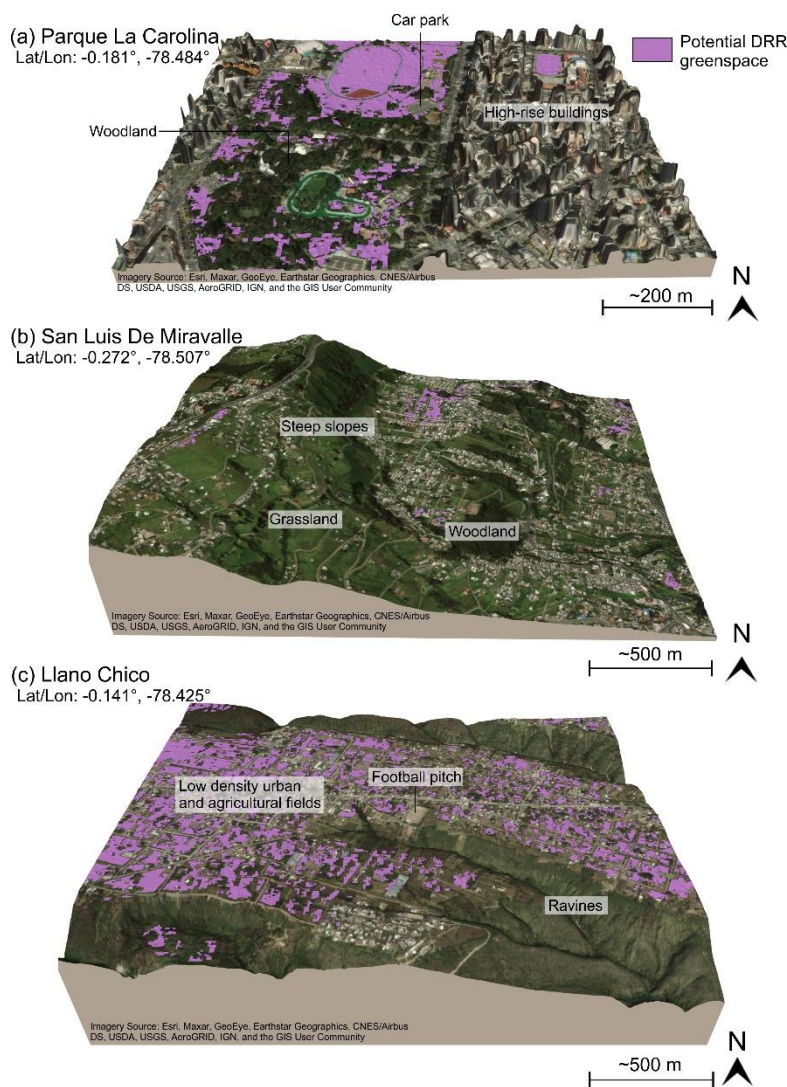

503

504 **Figure 12: 3D perspective showing examples of potential DRR greenspace identified in Quito. (a) Parque La Carolina is in central**  
505 **Quito amongst commercial high-rise buildings. (b) San Luis De Miravalle is located on the southeast of Quito and is characterised**  
506 **by lower density urban development and steep slopes. (c) Llano Chico is in the east of Quito with low density urban development**  
507 **mixed with agricultural land that is bounded by steep ravines.**

508 We found that 7% (2.5 km<sup>2</sup>) of the DMQ designated greenspace was identified as potential DRR greenspace. Similarly, 10%  
509 (1.7 km<sup>2</sup>) of the DMQ designated safe spaces intersected with our classified DRR greenspace (Fig. 8, 10a). The total area of  
510 potential DRR greenspace within Quito was 18.6 km<sup>2</sup>, therefore large potential exists to incorporate new greenspaces into a  
511 DRR framework, especially in the south and east of the city, which are locations of projected future expansion and where  
512 urban expansion and population densities are lower (Fig. 5b, 9d). New designation of greenspaces could address some of the  
513 imbalance between greenspace access since 98% (~2.3 million) of Quito's population were within 800 m of a designated  
514 greenspace, compared to 2.1 million for the DRR greenspace (88%) (Fig. 9a). Lower socioeconomic classifications had a



515 greater distance to travel to the nearest designated greenspace, and a lower greenspace area per person overall (Fig. 9b, c),  
516 which was also observed by Cuvi et al. (2021), noting that informal developments have less access to larger designated  
517 parks. We found a median designated greenspace of 3 m<sup>2</sup> per person for the ‘low’ socioeconomic classification. However,  
518 the availability of potential DRR greenspace to these same communities (median of 24 m<sup>2</sup>) shows that additional  
519 designations could help address the imbalance. This is also aligned with Quito’s Vision 2040 document to increase  
520 greenspace in urban areas to ~9 m<sup>2</sup> per person (DMQ, 2018). Critical to addressing these inequalities is to ensure that all  
521 formal and informal settlements are reflected in socioeconomic statistics and included in official maps.

522  
523 Although we found high accessibility of greenspace within 800 m of populations, the capacity to serve surrounding  
524 populations for emergency refuge was 1.7% considering the recommended space allocation of 45 m<sup>2</sup> per person (Fig.  
525 9a)(Sphere Association, 2018). Incorporating all additional spaces that are DRR suitable could increase this to 8 %, or 40%  
526 using a minimum living allocation of 3 m<sup>2</sup> per person (Sphere Association, 2018). A network analysis producing a ranked  
527 top ten DRR greenspaces (Fig. 11) showed that eight intersected with currently designated greenspaces or safe spaces and  
528 two did not. These two spaces could be investigated for negotiating formal access to these spaces for use in an emergency,  
529 such as the golf club forming Site 5 (Fig. 11e).

530  
531 We focus on greenspace as an emergency refuge; however, these spaces can also contribute to mitigating hazards both  
532 through physical processes such as water retention or slope stabilisation (Phillips and Marden, 2005; Maragno et al., 2018;  
533 Sandholz et al., 2018), and also by their existence in places that would be hazardous if urbanised. We found that of the  
534 potential DRR greenspace identified in Quito, 62% intersected with TWI values indicative of potential flooding (section  
535 4.2), 10% with areas of high landslide susceptibility, and 6% with both hazards (Fig. 8 – red circles). Therefore, there is  
536 potential to mitigate future risk by maintaining greenspace and therefore avoiding development in potentially hazardous  
537 areas, and incorporating additional DRR greenspaces that are not exposed to hazards for use as refuges.

### 538 **5.3 Future work**

539 Our study has provided a city-wide assessment of Quito’s historical and future growth projections, and the potential role of  
540 greenspace in reducing disaster risk. The first-pass analysis of greenspace suitable for DRR could be used for local  
541 community-scale evaluation and stakeholder engagement to deliver improved resilience for the city. Subsequently, the  
542 methodology could be expanded to define a continuum of greenspace suitability for DRR by incorporating other important  
543 factors including site specific suitability trade-offs such as land value, ownership, and access to water, electricity, and  
544 hospitals (Anhorn and Khazai, 2015; Hosseini et al., 2016). Similarly, we focussed on greenspaces since these spaces are  
545 most likely to be accessible and they provide multiple benefits; however, concreted grey spaces such as commercial car  
546 parks could also serve a role in providing safe spaces for DRR, particularly if a disaster event occurred during work hours.



547 Methodological improvements could include multi-temporal and potentially higher resolution datasets, for example landslide  
548 susceptibility information that reflects changing land cover and therefore an evolving hazard (Emberson et al., 2020).

549  
550 Use of EO-based datasets broadens the applicability of our methods to other cities. Whilst coarser resolution satellite  
551 imagery could still delineate the types of greenspaces relevant to DRR (e.g. Fig. 8 inset), we relied on a high resolution  
552 Pleiades DEM to provide topographic relief information on the greenspace DRR suitability. Global 30 m resolution DEMs  
553 could likely substitute this in some cases, though not in densely built urban environment where flat open greenspaces are  
554 interspaced with tall buildings and trees for example (Fig. 12a), which cannot be resolved in 30 m elevation models.

## 555 **6 Conclusion**

556 In this study, we used a combination of satellite data analysis and secondary datasets to quantify Quito's historical growth,  
557 future intersection with hazards, and distribution of greenspace within the city. Quito's historical growth (~192 km<sup>2</sup> 1986 to  
558 2020) was primarily on flatter, former agricultural land, hence there was limited encroachment towards hazards of Pichincha  
559 volcano and areas of higher landslide susceptibility. However, our work shows that future urbanisation projections suggest  
560 an increasing intersection between urban areas and areas of high landslide susceptibility, which requires risk-informed  
561 planning to mitigate. General accessibility of greenspaces is high, with 98% (2.3 million) of Quito's population within 800 m  
562 of a designated greenspace and 88% (2.1 million) for the DRR greenspace classification. However, within 800 m, the  
563 capacity of currently designated greenspaces and safe spaces would only fulfil 2% of Quito's population. Over 40% could be  
564 accommodated by incorporating new DRR greenspaces identified in this study. We also found a disparity between access to  
565 greenspaces across socio-economic classifications, with low-medium groups having less access to designated greenspace. In  
566 some cases, these low-medium groups have the greatest opportunity for future designation of DRR greenspace due to their  
567 location on the city periphery in areas of lower population density. Our workflow uses satellite data to provide a first-pass  
568 evaluation of DRR greenspace potential and could therefore be adapted for application in other developing cities. The results  
569 provide the foundation to evaluate these spaces with stakeholders at community to city-wide scales, since promoting  
570 equitable access to greenspaces, communicating their multiple benefits, and considering their use to restrict development in  
571 hazardous areas will be key to sustainable, risk-informed urban growth.

## 572 **Data availability**

573 The data used to support the findings and results of this study are available in the supplementary information and in the  
574 Zenodo repository <https://doi.org/10.5281/zenodo.5881876>. Pleiades imagery data were provided through the CEOS Seismic  
575 Hazard Demonstrator and are restricted by license.



576 **Author contribution**

577 All authors have read and agreed to the published version of the manuscript. CSW, ES, MAV, JRE, and SKE designed the  
578 concept. JRE, CZ, SB-B, PC, DFO provided access to datasets. CSW performed the analysis and prepared the figures. CSW  
579 wrote the manuscript with input from all authors.

580 **Competing interests**

581 The authors declare that they have no conflict of interest.

582 **Financial support**

583 This research has been supported the UK Research and Innovation (UKRI) Global Challenges Research Fund (GCRF) Urban  
584 Disaster Risk Hub (NE/S009000/1) (Tomorrow's Cities), a NERC Innovation award (grant number NE/S013911/1), and  
585 COMET. COMET is the NERC Centre for the Observation and Modelling of Earthquakes, Volcanoes and Tectonics, a  
586 partnership between UK Universities and the British Geological Survey. John Elliott is supported by a Royal Society  
587 University Research fellowship (UF150282), Susanna Ebmeier is supported by a NERC Independent Research Fellowship  
588 (NE/R015546/1).

589 **Acknowledgments**

590 The Committee on Earth Observation Satellites (CEOS) and Centre National d'Etudes Spatiales (CNES) are thanked for  
591 providing access to the Pleiades satellite imagery used in this study. Pleiades images made available by CNES in the  
592 framework of the CEOS Working Group for Disasters. © CNES (2018, 2019, 2020), and Airbus DS, all rights reserved.  
593 Commercial uses forbidden.

594 **References**

- 595 Airbus Defence and Space: Pléiades Imagery User Guide. [Accessed 29th October 2019] Available from:  
596 <https://www.intelligence-airbusds.com/en/8718-user-guides>, 2012.
- 597 Allan, P., Bryant, M., Wirsching, C., Garcia, D., and Teresa Rodriguez, M.: The Influence of Urban Morphology on the  
598 Resilience of Cities Following an Earthquake, *Journal of Urban Design*, 18, 242-262, 10.1080/13574809.2013.772881, 2013.
- 599 Altieri, M. A., Companioni, N., Cañizares, K., Murphy, C., Rosset, P., Bourque, M., and Nicholls, C. I.: The greening of the  
600 "barrios": Urban agriculture for food security in Cuba, *Agriculture and Human Values*, 16, 131-140,  
601 10.1023/A:1007545304561, 1999.





- 602 Alvarado, A., Audin, L., Nocquet, J. M., Lagreulet, S., Segovia, M., Font, Y., Lamarque, G., Yepes, H., Mothes, P.,  
603 Rolandone, F., Jarrín, P., and Quidelleur, X.: Active tectonics in Quito, Ecuador, assessed by geomorphological studies, GPS  
604 data, and crustal seismicity, 33, 67-83, 10.1002/2012tc003224, 2014.
- 605 Amey, R. M. J., Elliott, J. R., Hussain, E., Walker, R., Pagani, M., Silva, V., Abdrakhmatov, K. E., and Watson, C. S.:  
606 Significant Seismic Risk Potential from Buried Faults Beneath Almaty City, Kazakhstan, revealed from high-resolution  
607 satellite DEMs, Earth and Space Science, <https://doi.org/10.1029/2021EA001664>, 2021.
- 608 Anhorn, J., and Khazai, B.: Open space suitability analysis for emergency shelter after an earthquake, Nat. Hazards Earth  
609 Syst. Sci., 15, 789-803, 10.5194/nhess-15-789-2015, 2015.
- 610 Aragundi, S. M., Mena, A. P., and Zamora, J. J.: Historical Urban Landscape as a Descriptive Feature for Risk Assessment:  
611 the 'Quebradas' of Quito, FICUP. An International Conference on Urban Physics, Quito – Galápagos, Ecuador, 2016.
- 612 Aronson, M. F., Lepczyk, C. A., Evans, K. L., Goddard, M. A., Lerman, S. B., MacIvor, J. S., Nilon, C. H., and Vargo, T.:  
613 Biodiversity in the city: key challenges for urban green space management, Frontiers in Ecology and the Environment, 15,  
614 189-196, <https://doi.org/10.1002/fee.1480>, 2017.
- 615 Baker, J. L.: Climate Change, Disaster Risk, and the Urban Poor, Climate Change, Disaster Risk, and the Urban Poor, 2012.
- 616 Bauwelinck, M., Casas, L., Nawrot, T. S., Nemery, B., Trabelsi, S., Thomas, I., Aerts, R., Lefebvre, W., Vanpoucke, C., Van  
617 Nieuwenhuysse, A., Deboosere, P., and Vandenhede, H.: Residing in urban areas with higher green space is associated with  
618 lower mortality risk: A census-based cohort study with ten years of follow-up, Environment International, 148, 106365,  
619 <https://doi.org/10.1016/j.envint.2020.106365>, 2021.
- 620 Beauval, C., Marinier, J., Yepes, H., Audin, L., Nocquet, J. M., Alvarado, A., Baize, S., Aguilar, J., Singaicho, J., and  
621 Jomard, H.: A New Seismic Hazard Model for Ecuador, Bulletin of the Seismological Society of America, 108,  
622 10.1785/0120170259, 2018.
- 623 Benedict, M., and MacMahon, E.: Green Infrastructure: Smart Conservation for the 21st Century, 2002.
- 624 Beven, K. J., and Kirkby, M. J.: A physically based, variable contributing area model of basin hydrology / Un modèle à base  
625 physique de zone d'appel variable de l'hydrologie du bassin versant, Hydrological Sciences Bulletin, 24, 43-69,  
626 10.1080/02626667909491834, 1979.
- 627 Bonilla-Bedoya, S., Estrella, A., Vaca Yáñez, A., and Herrera, M. Á.: Urban socio-ecological dynamics: applying the urban-  
628 rural gradient approach in a high Andean city, Landscape Research, 45, 327-345, 10.1080/01426397.2019.1641589, 2020a.
- 629 Bonilla-Bedoya, S., Mora, A., Vaca, A., Estrella, A., and Herrera, M. Á.: Modelling the relationship between urban  
630 expansion processes and urban forest characteristics: An application to the Metropolitan District of Quito, Computers,  
631 Environment and Urban Systems, 79, 101420, <https://doi.org/10.1016/j.compenvurbsys.2019.101420>, 2020b.
- 632 Borland, J.: Small parks, big designs: reconstructed Tokyo's new green spaces, 1923–1931, Urban History, 47, 106-125,  
633 10.1017/S0963926819000567, 2020.
- 634 Boulton, C., Dedekorkut-Howes, A., and Byrne, J.: Factors shaping urban greenspace provision: A systematic review of the  
635 literature, Landscape and Urban Planning, 178, 82-101, <https://doi.org/10.1016/j.landurbplan.2018.05.029>, 2018.
- 636 Bryant, M., and Allan, P.: Open space innovation in earthquake affected cities, in: Approaches to Disaster Management -  
637 Examining the Implications of Hazards, Emergencies and Disasters, edited by: (ed.), J. P. T., In-Tech, 2013.



- 638 Cardona, O., Aalst, M., Birkmann, J., Fordham, M., McGregor, G., Perez, R., Pulwarty, R., Schipper, L., and Sinh, B.:  
639 Determinants of risk: Exposure and vulnerability, in managing the risks of extreme events and disasters to advance climate  
640 change adaptation, 65-108 pp., 2012.
- 641 Carmin, J., and Anguelovski, I.: Planning Climate Resilient Cities: Early Lessons from Early Adapters, 2009.
- 642 Carrión, F., and Erazo Espinosa, J.: La forma urbana de Quito: una historia de centros y periferias, Bulletin de l'Institut  
643 français d'études andines, 503-522, 2012.
- 644 Castelo, C. A. J., D'Howitt, M. C., Almeida, O. P., and Toulkeridis, T.: Comparative Determination of the Probability of  
645 Landslide Occurrences and Susceptibility in Central Quito, Ecuador, 2018 International Conference on eDemocracy &  
646 eGovernment (ICEDEG), 2018, 136-143,
- 647 Chatelain, J. L., Tucker, B., Guillier, B., Kaneko, F., Yepes, H., Fernandez, J., Valverde, J., Hofer, G., Souris, M., Dupérier,  
648 E., Yamada, T., Bustamante, G., and Villacis, C.: Earthquake risk management pilot project in Quito, Ecuador, GeoJournal,  
649 49, 185-196, 10.1023/A:1007079403225, 1999.
- 650 Colding, J., and Barthel, S.: The potential of 'Urban Green Commons' in the resilience building of cities, Ecological  
651 Economics, 86, 156-166, <https://doi.org/10.1016/j.ecolecon.2012.10.016>, 2013.
- 652 Cuvi, N., and Vélez, L. C. G.: Los Parques Urbanos de Quito: Distribución, Accesibilidad y Segregación Espacial,  
653 Environmental Science, 10, 2021.
- 654 De Sherbinin, A., Schiller, A., and Pulsipher, A.: The vulnerability of global cities to climate hazards, Environment and  
655 Urbanization, 19, 39-64, 10.1177/0956247807076725, 2007.
- 656 Deng, J., Huang, Y., Chen, B., Tong, C., Liu, P., Wang, H., and Hong, Y.: A Methodology to Monitor Urban Expansion and  
657 Green Space Change Using a Time Series of Multi-Sensor SPOT and Sentinel-2A Images, Remote Sensing, 11, 1230, 2019.
- 658 DMQ: Visión de Quito 2040 y su Nuevo Modelo de Ciudad, 2018.
- 659 Domínguez-Castro, F., García-Herrera, R., and Vicente-Serrano, S. M.: Wet and dry extremes in Quito (Ecuador) since the  
660 17th century, International Journal of Climatology, 38, 2006-2014, 10.1002/joc.5312, 2018.
- 661 Dou, K., and Zhan, Q.: Accessibility analysis of urban emergency shelters: Comparing gravity model and space syntax, 2011  
662 International Conference on Remote Sensing, Environment and Transportation Engineering, 2011, 5681-5684,
- 663 Emberson, R., Kirschbaum, D., and Stanley, T.: New global characterisation of landslide exposure, Nat. Hazards Earth Syst.  
664 Sci., 20, 3413-3424, 10.5194/nhess-20-3413-2020, 2020.
- 665 Escobedo, F. J., and Nowak, D. J.: Spatial heterogeneity and air pollution removal by an urban forest, Landscape and Urban  
666 Planning, 90, 102-110, <https://doi.org/10.1016/j.landurbplan.2008.10.021>, 2009.
- 667 Estrella, M., and Saalimaa, N.: Ecosystem-based disaster risk reduction (Eco-DRR): An overview, The role of ecosystems  
668 in disaster risk reduction, edited by: Renaud, F. G., Sudmeier-Rieux, K., and Estrella, M., United Nations University Press,  
669 2013.
- 670 Faivre, N., Sgobbi, A., Happaerts, S., Raynal, J., and Schmidt, L.: Translating the Sendai Framework into action: The EU  
671 approach to ecosystem-based disaster risk reduction, International Journal of Disaster Risk Reduction, 32, 4-10,  
672 <https://doi.org/10.1016/j.ijdr.2017.12.015>, 2018.



- 673 Farr, T. G., Rosen, P. A., Caro, E., Crippen, R., Duren, R., Hensley, S., Kobrick, M., Paller, M., Rodriguez, E., Roth, L.,  
674 Seal, D., Shaffer, S., Shimada, J., Umland, J., Werner, M., Oskin, M., Burbank, D., and Alsdorf, D.: The Shuttle Radar  
675 Topography Mission, *Reviews of Geophysics*, 45, 10.1029/2005RG000183, 2007.
- 676 Fenger, J.: Urban air quality, *Atmospheric Environment*, 33, 4877-4900, [https://doi.org/10.1016/S1352-2310\(99\)00290-3](https://doi.org/10.1016/S1352-2310(99)00290-3),  
677 1999.
- 678 Flörke, M., Schneider, C., and McDonald, R. I.: Water competition between cities and agriculture driven by climate change  
679 and urban growth, *Nature Sustainability*, 1, 51-58, 10.1038/s41893-017-0006-8, 2018.
- 680 Fuller, R., Groom, G., and Jones, A.: The land-cover map of great Britain: an automated classification of landsat thematic  
681 mapper data, *Photogrammetric Engineering and Remote Sensing*, 60, 553-562, 1994.
- 682 García-Lamarca, M., Connolly, J., and Anguelovski, I.: Green gentrification and displacement in Barcelona, in: *Housing  
683 Displacement*, Routledge, 156-170, 2020.
- 684 Georganos, S., Grippa, T., Vanhuysse, S., Lennert, M., Shimoni, M., and Wolff, E.: Very High Resolution Object-Based  
685 Land Use–Land Cover Urban Classification Using Extreme Gradient Boosting, *IEEE Geoscience and Remote Sensing  
686 Letters*, 15, 607-611, 10.1109/LGRS.2018.2803259, 2018.
- 687 Gill, J. C., and Malamud, B. D.: Anthropogenic processes, natural hazards, and interactions in a multi-hazard framework,  
688 *Earth-Science Reviews*, 166, 246-269, <https://doi.org/10.1016/j.earscirev.2017.01.002>, 2017.
- 689 Gill, J. C., Hussain, E., and Malamud, B. D.: Workshop Report: Multi-Hazard Risk Scenarios for Tomorrow's Cities.  
690 [Accessed 18th May 2021]. Available from: [https://tomorrowscities.org/workshop-report-multi-hazard-risk-scenarios-  
691 tomorrowscities](https://tomorrowscities.org/workshop-report-multi-hazard-risk-scenarios-tomorrowscities), 2021.
- 692 Godfray, H. C. J., Beddington, J. R., Crute, I. R., Haddad, L., Lawrence, D., Muir, J. F., Pretty, J., Robinson, S., Thomas, S.  
693 M., and Toulmin, C.: Food Security: The Challenge of Feeding 9 Billion People, *Science*, 327, 812-818,  
694 10.1126/science.1185383, 2010.
- 695 Gonzalez, C. G.: Seasons of Resistance: Sustainable Agriculture and Food Security in Cuba, *Tulane Environmental Law  
696 Journal*, 16, 685-732, 2003.
- 697 Gorelick, N., Hancher, M., Dixon, M., Ilyushchenko, S., Thau, D., and Moore, R.: Google Earth Engine: Planetary-scale  
698 geospatial analysis for everyone, *Remote Sensing of Environment*, 202, 18-27, <https://doi.org/10.1016/j.rse.2017.06.031>,  
699 2017.
- 700 Gregory McPherson, E.: Accounting for benefits and costs of urban greenspace, *Landscape and Urban Planning*, 22, 41-51,  
701 [https://doi.org/10.1016/0169-2046\(92\)90006-L](https://doi.org/10.1016/0169-2046(92)90006-L), 1992.
- 702 Hall, M. L., Samaniego, P., Le Pennec, J. L., and Johnson, J. B.: Ecuadorian Andes volcanism: A review of Late Pliocene to  
703 present activity, *Journal of Volcanology and Geothermal Research*, 176, 1-6,  
704 <https://doi.org/10.1016/j.jvolgeores.2008.06.012>, 2008.
- 705 Hastenrath, S.: Annual cycle of upper air circulation and convective activity over the tropical Americas, *Journal of  
706 Geophysical Research: Atmospheres*, 102, 4267-4274, <https://doi.org/10.1029/96JD03122>, 1997.
- 707 Hoekstra, A. Y., Buurman, J., and van Ginkel, K. C. H.: Urban water security: A review, *Environ. Res. Lett.*, 13, 053002,  
708 10.1088/1748-9326/aaba52, 2018.



- 709 Hosseini, S. A., de la Fuente, A., and Pons, O.: Multicriteria decision-making method for sustainable site location of post-  
710 disaster temporary housing in urban areas, *Journal of Construction Engineering and Management*, 142, 04016036, 2016.
- 711 IG-EPN, IGM, IRD.: Mapa de Peligros Volcánicos Potenciales del Volcán Guagua Pichincha 3ra. Edición, Quito - Ecuador.  
712 Available online: <https://www.igepn.edu.ec/ggp-mapa-de-peligros/file> (accessed 10 December 2020). 2019.
- 713 Inglada, J., and Christophe, E.: The Orfeo Toolbox remote sensing image processing software, 2009 IEEE International  
714 Geoscience and Remote Sensing Symposium, 2009, IV-733-IV-736,
- 715 Instituto Geográfico Militar: Fotografía aérea 360 Rollo 19 Cámara RC10 Proyecto Carta Nacional N-III\_1977 Escala  
716 1:60000 B/N. [online]. Accessed: 20 March 2020. Available from:  
717 <http://www.geoportaligm.gob.ec/geonetwork/srv/spa/catalog.search#/metadata/e56534b0-3b16-423e-a076-e0e41df07a81>,  
718 1977.
- 719 Instituto Geográfico Militar: Generation of geospatial information at a scale 1: 5 000 for the determination of the physical  
720 fitness of the territory and urban development through the use of geotechnologies [Spanish], 2019.
- 721 Jalayer, F., De Risi, R., De Paola, F., Giugni, M., Manfredi, G., Gasparini, P., Topa, M. E., Yonas, N., Yeshitela, K.,  
722 Nebebe, A., Cavan, G., Lindley, S., Printz, A., and Renner, F.: Probabilistic GIS-based method for delineation of urban  
723 flooding risk hotspots, *Natural Hazards*, 73, 975-1001, 10.1007/s11069-014-1119-2, 2014.
- 724 James, P., Banay, R. F., Hart, J. E., and Laden, F.: A Review of the Health Benefits of Greenness, *Current Epidemiology*  
725 *Reports*, 2, 131-142, 10.1007/s40471-015-0043-7, 2015.
- 726 Jeong, D., Kim, M., Song, K., and Lee, J.: Planning a Green Infrastructure Network to Integrate Potential Evacuation Routes  
727 and the Urban Green Space in a Coastal City: The Case Study of Haeundae District, Busan, South Korea, *Science of The*  
728 *Total Environment*, 761, 143179, <https://doi.org/10.1016/j.scitotenv.2020.143179>, 2021.
- 729 Kelleher, C., and McPhillips, L.: Exploring the application of topographic indices in urban areas as indicators of pluvial  
730 flooding locations, *Hydrological Processes*, 34, 780-794, 2020.
- 731 Kennedy, R. E., Yang, Z., Gorelick, N., Braaten, J., Cavalcante, L., Cohen, W. B., and Healey, S.: Implementation of the  
732 LandTrendr Algorithm on Google Earth Engine, *Remote Sensing*, 10, 691, 2018.
- 733 Khazai, B., Anhorn, J., Girard, T., Brink, S., Daniell, J., Bessel, T., Mühr, B., Flörchinger, V., and Kunz-Plapp, T.: Shelter  
734 response and vulnerability of displaced populations in the April 25, 2015 Nepal Earthquake, Center for Disaster  
735 Management and Risk Reduction Technology of the Karlsruhe Institute of Technology, and the South Asia Institute,  
736 Heidelberg University, 5, 2015, 2015.
- 737 Kılci, F., Kara, B. Y., and Bozkaya, B.: Locating temporary shelter areas after an earthquake: A case for Turkey, *European*  
738 *Journal of Operational Research*, 243, 323-332, <https://doi.org/10.1016/j.ejor.2014.11.035>, 2015.
- 739 Kirschbaum, D., Stanley, T., and Yatheendradas, S.: Modeling landslide susceptibility over large regions with fuzzy overlay,  
740 *Landslides*, 13, 485-496, 10.1007/s10346-015-0577-2, 2016.
- 741 Kumar, P., Debele, S. E., Sahani, J., Rawat, N., Marti-Cardona, B., Alfieri, S. M., Basu, B., Basu, A. S., Bowyer, P.,  
742 Charizopoulos, N., Jaakko, J., Loupis, M., Menenti, M., Mickovski, S. B., Pfeiffer, J., Pilla, F., Pröll, J., Pulvirenti, B.,  
743 Rutzinger, M., Sannigrahi, S., Spyrou, C., Tuomenvirta, H., Vojinovic, Z., and Zieher, T.: An overview of monitoring  
744 methods for assessing the performance of nature-based solutions against natural hazards, *Earth-Science Reviews*, 217,  
745 103603, <https://doi.org/10.1016/j.earscirev.2021.103603>, 2021.



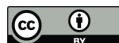

- 746 Labib, S. M., and Harris, A.: The potentials of Sentinel-2 and LandSat-8 data in green infrastructure extraction, using object  
747 based image analysis (OBIA) method, *European Journal of Remote Sensing*, 51, 231-240, 10.1080/22797254.2017.1419441,  
748 2018.
- 749 Lidberg, W., Nilsson, M., Lundmark, T., and Ågren, A. M.: Evaluating preprocessing methods of digital elevation models  
750 for hydrological modelling, *Hydrological Processes*, 31, 4660-4668, 2017.
- 751 Liu, Q., Ruan, X., and Shi, P.: Selection of emergency shelter sites for seismic disasters in mountainous regions: Lessons  
752 from the 2008 Wenchuan Ms 8.0 Earthquake, China, *Journal of Asian Earth Sciences*, 40, 926-934, 2011.
- 753 Loughlin, S. C., Sparks, R. S. J., Sparks, S., Brown, S. K., Jenkins, S. F., and Vye-Brown, C.: *Global volcanic hazards and  
754 risk*, Cambridge University Press, 2015.
- 755 Manfreda, S., Di Leo, M., and Sole, A.: Detection of flood-prone areas using digital elevation models, *Journal of Hydrologic  
756 Engineering*, 16, 781-790, 2011.
- 757 Maragno, D., Gaglio, M., Robbi, M., Appiotti, F., Fano, E. A., and Gissi, E.: Fine-scale analysis of urban flooding reduction  
758 from green infrastructure: An ecosystem services approach for the management of water flows, *Ecological Modelling*, 386,  
759 1-10, <https://doi.org/10.1016/j.ecolmodel.2018.08.002>, 2018.
- 760 Markus, T., Neumann, T., Martino, A., Abdalati, W., Brunt, K., Csatho, B., Farrell, S., Fricker, H., Gardner, A., Harding, D.,  
761 Jasinski, M., Kwok, R., Magruder, L., Lubin, D., Luthcke, S., Morison, J., Nelson, R., Neuenschwander, A., Palm, S.,  
762 Popescu, S., Shum, C. K., Schutz, B. E., Smith, B., Yang, Y., and Zwally, J.: The Ice, Cloud, and land Elevation Satellite-2  
763 (ICESat-2): Science requirements, concept, and implementation, *Remote Sensing of Environment*, 190, 260-273,  
764 <https://doi.org/10.1016/j.rse.2016.12.029>, 2017.
- 765 Marmot, M., Friel, S., Bell, R., Houweling, T. A. J., and Taylor, S.: Closing the gap in a generation: health equity through  
766 action on the social determinants of health, *The Lancet*, 372, 1661-1669, [https://doi.org/10.1016/S0140-6736\(08\)61690-6](https://doi.org/10.1016/S0140-6736(08)61690-6),  
767 2008.
- 768 Marselle, M. R., Bowler, D. E., Watzema, J., Eichenberg, D., Kirsten, T., and Bonn, A.: Urban street tree biodiversity and  
769 antidepressant prescriptions, *Scientific Reports*, 10, 22445, 10.1038/s41598-020-79924-5, 2020.
- 770 Mattivi, P., Franci, F., Lambertini, A., and Bitelli, G.: TWI computation: a comparison of different open source GISs, *Open  
771 Geospatial Data, Software and Standards*, 4, 1-12, 2019.
- 772 McDonald, R. I., Mansur, A. V., Ascensão, F., Colbert, M. I., Crossman, K., Elmqvist, T., Gonzalez, A., Güneralp, B.,  
773 Haase, D., Hamann, M., Hillel, O., Huang, K., Kahnt, B., Maddox, D., Pacheco, A., Pereira, H. M., Seto, K. C., Simkin, R.,  
774 Walsh, B., Werner, A. S., and Ziter, C.: Research gaps in knowledge of the impact of urban growth on biodiversity, *Nature  
775 Sustainability*, 3, 16-24, 10.1038/s41893-019-0436-6, 2020.
- 776 McVittie, A., Cole, L., Wreford, A., Sgobbi, A., and Yordi, B.: Ecosystem-based solutions for disaster risk reduction:  
777 Lessons from European applications of ecosystem-based adaptation measures, *International Journal of Disaster Risk  
778 Reduction*, 32, 42-54, <https://doi.org/10.1016/j.ijdr.2017.12.014>, 2018.
- 779 Metro Ecuador: En caso de un sismo en Quito, estos son los sitios seguros en la ciudad. Metro Ecuador. [Online]. 12  
780 December. [Accessed 01 November 2021]. Available from: [https://www.metroecuador.com.ec/ec/noticias/2019/05/28/caso-  
781 temblor-estos-los-sitios-seguros-quito.html](https://www.metroecuador.com.ec/ec/noticias/2019/05/28/caso-temblor-estos-los-sitios-seguros-quito.html). 2019.



- 782 Millard, K., and Richardson, M.: On the Importance of Training Data Sample Selection in Random Forest Image  
783 Classification: A Case Study in Peatland Ecosystem Mapping, *Remote. Sens.*, 7, 8489-8515, 2015.
- 784 Ministry of Territory. Habitat and Housing.: Accidentes.  
785 <https://territorio.maps.arcgis.com/home/item.html?id=5270bc85cf3249b29937d25d0b363396>, 2020.
- 786 Myint, S. W., Gober, P., Brazel, A., Grossman-Clarke, S., and Weng, Q.: Per-pixel vs. object-based classification of urban  
787 land cover extraction using high spatial resolution imagery, *Remote Sensing of Environment*, 115, 1145-1161,  
788 <http://dx.doi.org/10.1016/j.rse.2010.12.017>, 2011.
- 789 Neumann, T. A., Martino, A. J., Markus, T., Bae, S., Bock, M. R., Brenner, A. C., Brunt, K. M., Cavanaugh, J., Fernandes,  
790 S. T., Hancock, D. W., Harbeck, K., Lee, J., Kurtz, N. T., Luers, P. J., Luthcke, S. B., Magruder, L., Pennington, T. A.,  
791 Ramos-Izquierdo, L., Rebold, T., Skoog, J., and Thomas, T. C.: The Ice, Cloud, and Land Elevation Satellite – 2 mission: A  
792 global geolocated photon product derived from the Advanced Topographic Laser Altimeter System, *Remote Sensing of  
793 Environment*, 233, 111325, <https://doi.org/10.1016/j.rse.2019.111325>, 2019.
- 794 Neumann, T. A., A. Brenner, D. Hancock, J. Robbins, J. Saba, K. Harbeck, A. Gibbons, J. Lee, S. B. Luthcke, T. Rebold, .  
795 ATLAS/ICESat-2 L2A Global Geolocated Photon Data, Version 3. Boulder, Colorado USA. NASA National Snow and Ice  
796 Data Center Distributed Active Archive Center. doi: <https://doi.org/10.5067/ATLAS/ATL03.003>. [Accessed 7th December  
797 2020]. 2020.
- 798 Nuth, C., and Kääb, A.: Co-registration and bias corrections of satellite elevation data sets for quantifying glacier thickness  
799 change, *The Cryosphere*, 5, 271-290, <https://doi.org/10.1016/10.5194/tc-5-271-2011>, 2011.
- 800 Oliver-Smith, A., Alcántara-Ayala, I., I. B., and Lavell, A.: Forensic Investigations of Disasters (FORIN): a conceptual  
801 framework and guide to research. Available online: [http://www.irdrinternational.org/wp-content/uploads/2016/01/FORIN-2-  
802 29022016.pdf](http://www.irdrinternational.org/wp-content/uploads/2016/01/FORIN-2-29022016.pdf)  
803 (accessed on 11 November 2019). 2016.
- 804 Olofsson, P., Foody, G. M., Stehman, S. V., and Woodcock, C. E.: Making better use of accuracy data in land change  
805 studies: Estimating accuracy and area and quantifying uncertainty using stratified estimation, *Remote Sensing of  
806 Environment*, 129, 122-131, <https://doi.org/10.1016/j.rse.2012.10.031>, 2013.
- 807 Olofsson, P., Foody, G. M., Herold, M., Stehman, S. V., Woodcock, C. E., and Wulder, M. A.: Good practices for estimating  
808 area and assessing accuracy of land change, *Remote Sensing of Environment*, 148, 42-57,  
809 <https://doi.org/10.1016/j.rse.2014.02.015>, 2014.
- 810 Onuma, A., and Tsuge, T.: Comparing green infrastructure as ecosystem-based disaster risk reduction with gray  
811 infrastructure in terms of costs and benefits under uncertainty: A theoretical approach, *International Journal of Disaster Risk  
812 Reduction*, 32, 22-28, <https://doi.org/10.1016/j.ijdr.2018.01.025>, 2018.
- 813 Pagani, M., Garcia-Pelaez, J., Gee, R., Johnson, K., Poggi, V., Styron, R., Weatherill, G., Simionato, M., Viganò, D.,  
814 Danciu, L., and Monelli, D.: Global Earthquake Model (GEM) Seismic Hazard Map (version 2018.1 - December 2018).  
815 Available online: <https://www.globalquakemodel.org/gem-maps/global-earthquake-hazard-map> (accessed 5 May 2021).  
816 DOI: 10.13117/GEM-GLOBAL-SEISMIC-HAZARD-MAP-2018.1, 2018.
- 817 Passalacqua, P., Belmont, P., Staley, D. M., Simley, J. D., Arrowsmith, J. R., Bode, C. A., Crosby, C., DeLong, S. B., Glenn,  
818 N. F., Kelly, S. A., Lague, D., Sangireddy, H., Schaffrath, K., Tarboton, D. G., Wasklewicz, T., and Wheaton, J. M.:  
819 Analyzing high resolution topography for advancing the understanding of mass and energy transfer through landscapes: A  
820 review, *Earth-Science Reviews*, 148, 174-193, <http://dx.doi.org/10.1016/j.earscirev.2015.05.012>, 2015.



- 821 Pelling, M., Maskrey, A., Ruiz, P., Hall, P., Peduzzi, P., Dao, Q.-H., Mouton, F., Herold, C., and Kluser, S.: Reducing  
822 disaster risk: a challenge for development, 2004.
- 823 Peralta Arias, J. J., and Higuera García, E.: Evaluación sostenible de los Planes Directores de Quito. Periodo 1942-2012,  
824 2016.
- 825 Pettorelli, N., Vik, J. O., Mysterud, A., Gaillard, J.-M., Tucker, C. J., and Stenseth, N. C.: Using the satellite-derived NDVI  
826 to assess ecological responses to environmental change, *Trends in Ecology & Evolution*, 20, 503-510,  
827 <https://doi.org/10.1016/j.tree.2005.05.011>, 2005.
- 828 Phillips, C., and Marden, M.: Reforestation Schemes to Manage Regional Landslide Risk, in: *Landslide Hazard and Risk*,  
829 517-547, 2005.
- 830 Rebotier, J.: El riesgo y su gestión en Ecuador: una mirada de geografía social y política, Centro de Publicaciones Pontificia  
831 Universidad Católica del Ecuador, 2016.
- 832 Robin, C., Samaniego, P., Le Pennec, J.-L., Mothes, P., and van der Plicht, J.: Late Holocene phases of dome growth and  
833 Plinian activity at Guagua Pichincha volcano (Ecuador), *Journal of Volcanology and Geothermal Research*, 176, 7-15,  
834 <https://doi.org/10.1016/j.jvolgeores.2007.10.008>, 2008.
- 835 Rodríguez-Galiano, V. F., Ghimire, B., Rogan, J., Chica-Olmo, M., and Rigol-Sánchez, J. P.: An assessment of the  
836 effectiveness of a random forest classifier for land-cover classification, *ISPRS Journal of Photogrammetry and Remote  
837 Sensing*, 67, 93-104, <https://doi.org/10.1016/j.isprsjprs.2011.11.002>, 2012.
- 838 Salazar, E., Henríquez, C., Sliuzas, R., and Qüense, J.: Evaluating Spatial Scenarios for Sustainable Development in Quito,  
839 Ecuador, *ISPRS Int. J. Geo Inf.*, 9, 141, 2020.
- 840 Salazar, E., Henríquez, C., Durán, G., Qüense, J., and Puente-Sotomayor, F.: How to Define a New Metropolitan Area? The  
841 Case of Quito, Ecuador, and Contributions for Urban Planning, *Land*, 10, 413, 2021.
- 842 Salmon, N., Yépez, G., Duque, M., Yépez, M., Báez, A., Masache-Heredia, M., Mejía, G., Mejía, P., Garofalo, G., and  
843 Montoya, D.: Co-design of a Nature-Based Solutions Ecosystem for Reactivating a Peri-Urban District in Quito, Ecuador, in:  
844 *Governance of Climate Responsive Cities: Exploring Cross-Scale Dynamics*, edited by: Peker, E., and Ataöv, A., Springer  
845 International Publishing, Cham, 79-104, 2021.
- 846 Sandholz, S., Lange, W., and Nehren, U.: Governing green change: Ecosystem-based measures for reducing landslide risk in  
847 Rio de Janeiro, *International Journal of Disaster Risk Reduction*, 32, 75-86, <https://doi.org/10.1016/j.ijdrr.2018.01.020>, 2018.
- 848 Schneider, A., and Woodcock, C. E.: Compact, Dispersed, Fragmented, Extensive? A Comparison of Urban Growth in  
849 Twenty-five Global Cities using Remotely Sensed Data, Pattern Metrics and Census Information, *Urban Studies*, 45, 659-  
850 692, 10.1177/0042098007087340, 2008.
- 851 Shimpo, N., Wesener, A., and McWilliam, W.: How community gardens may contribute to community resilience following  
852 an earthquake, *Urban Forestry & Urban Greening*, 38, 124-132, <https://doi.org/10.1016/j.ufug.2018.12.002>, 2019.
- 853 Shrestha, S. R., Sliuzas, R., and Kuffer, M.: Open spaces and risk perception in post-earthquake Kathmandu city, *Applied  
854 Geography*, 93, 81-91, <https://doi.org/10.1016/j.apgeog.2018.02.016>, 2018.
- 855 Sierra, A.: La política de mitigación de los riesgos en las laderas de Quito: ¿qué vulnerabilidad combatir?, 2009,



- 856 SNI: Archivos de Informacion Geografica. Peligro Volcánico [Accessed 24 August 2020], 2020.
- 857 Sphere Association: The Sphere Handbook: Humanitarian Charter and Minimum Standards in Humanitarian Response,  
858 fourth edition, Geneva, Switzerland,  
859 [www.spherestandards.org/handbook](http://www.spherestandards.org/handbook), 2018.
- 860 Stanley, T., and Kirschbaum, D. B.: A heuristic approach to global landslide susceptibility mapping, *Natural Hazards*, 87,  
861 145-164, <https://doi.org/10.1007/s11069-017-2757-y>, 2017.
- 862 Styron, R.: GEMScienceTools/gem-global-active-faults: First release of 2019 (Version 2019.0), ZENODO,  
863 <http://doi.org/10.5281/zenodo.3376300>, 2019.
- 864 Sudmeier-Rieux, K., Arce-Mojica, T., Boehmer, H. J., Doswald, N., Emerton, L., Friess, D. A., Galvin, S., Hagenlocher, M.,  
865 James, H., Laban, P., Lacambra, C., Lange, W., McAdoo, B. G., Moos, C., Mysiak, J., Narvaez, L., Nehren, U., Peduzzi, P.,  
866 Renaud, F. G., Sandholz, S., Schreyers, L., Sebesvari, Z., Tom, T., Triyanti, A., van Eijk, P., van Staveren, M., Vicarelli, M.,  
867 and Walz, Y.: Scientific evidence for ecosystem-based disaster risk reduction, *Nature Sustainability*, 4, 803-810,  
868 10.1038/s41893-021-00732-4, 2021.
- 869 Taylor, L., and Hochuli, D. F.: Defining greenspace: Multiple uses across multiple disciplines, *Landscape and Urban*  
870 *Planning*, 158, 25-38, <https://doi.org/10.1016/j.landurbplan.2016.09.024>, 2017.
- 871 Testori, G.: Gobierno Barrial de Atucucho. An urban alternative based on self-governance and direct democracy, 2016.
- 872 Tidball, K. G., and Krasny, M. E.: *Greening in the red zone: Disaster, Resilience and Community Greening*, Springer, 2012.
- 873 Tucker, C. J., Holben, B. N., Elgin, J. H., and McMurtrey, J. E.: Remote sensing of total dry-matter accumulation in winter  
874 wheat, *Remote Sensing of Environment*, 11, 171-189, [https://doi.org/10.1016/0034-4257\(81\)90018-3](https://doi.org/10.1016/0034-4257(81)90018-3), 1981.
- 875 UN-Habitat: *The Challenge of Slums: Global Report on Human Settlements 2003*. Available online:  
876 <https://www.alnap.org/help-library/the-challenge-of-slums-global-report-on-human-settlements-2003> (accessed on 4 May  
877 2021), 2003.
- 878 UN DESA: *World Urbanization Prospects: The 2018 Revision (ST/ESA/SER.A/420)*. New York: United Nations., 2019.
- 879 UN General Assembly: *Transforming our world: the 2030 Agenda for Sustainable Development*. Report No. A/RES/70/1,,  
880 2015.
- 881 Sendai framework for disaster risk reduction 2015 - 2030.:  
882 [https://www.preventionweb.net/files/43291\\_sendaiframeworkfordrren.pdf](https://www.preventionweb.net/files/43291_sendaiframeworkfordrren.pdf), access: 05 February 2020, 2015.
- 883 UNDRR: *Ecosystem-Based Disaster Risk Reduction: Implementing Nature-based Solutions for Resilience*, United Nations  
884 Office for Disaster Risk Reduction – Regional Office for Asia and the Pacific, Bangkok, Thailand, 2020.
- 885 Valcárcel, J., Despotaki, V., Burton, C., Yepes-Estrada, C., Silva, V., and Villacis, C.: *Integrated Assessment of Earthquake*  
886 *Risk in Quito, Ecuador Using Openquake*, 16th World Conference on Earthquake Engineering, 16WCEE 2017, 2017,
- 887 Valencia, V. H., Levin, G., and Hansen, H. S.: Modelling the spatial extent of urban growth using a cellular automata-based  
888 model: a case study for Quito, Ecuador, *Geografisk Tidsskrift-Danish Journal of Geography*, 120, 156-173,  
889 10.1080/00167223.2020.1823867, 2020.





- 890 Vidal, X., Burgos, L., and Zevallos, O.: 11 Protection and environmental restoration of the slopes of Pichincha in Quito,  
891 Ecuador, *Water and Cities in Latin America: Challenges for Sustainable Development*, 181, 2015.
- 892 Vincenti, S. S., Zuleta, D., Moscoso, V., Jácome, P., Palacios, E., and Villacís, M.: Análisis estadístico de datos  
893 meteorológicos mensuales y diarios para la determinación de variabilidad climática y cambio climático en el Distrito  
894 Metropolitano de Quito, *La Granja*, 16, 23-47, 2012.
- 895 WHO Regional Office for Europe: *Urban green spaces and health.*, 2016.
- 896 Wilson, T. M., Stewart, C., Sword-Daniels, V., Leonard, G. S., Johnston, D. M., Cole, J. W., Wardman, J., Wilson, G., and  
897 Barnard, S. T.: Volcanic ash impacts on critical infrastructure, *Physics and Chemistry of the Earth, Parts A/B/C*, 45-46, 5-23,  
898 <https://doi.org/10.1016/j.pce.2011.06.006>, 2012.
- 899 Wolch, J. R., Byrne, J., and Newell, J. P.: Urban green space, public health, and environmental justice: The challenge of  
900 making cities 'just green enough', *Landscape and Urban Planning*, 125, 234-244,  
901 <https://doi.org/10.1016/j.landurbplan.2014.01.017>, 2014.
- 902 Zalakeviciute, R., López-Villada, J., and Rybarczyk, Y.: Contrasted Effects of Relative Humidity and Precipitation on Urban  
903 PM2.5 Pollution in High Elevation Urban Areas, *Sustainability*, 10, 2064, 2018.
- 904 Zambrano-Barragán, C., Zevallos, O., Villacís, M., and Enríquez, D.: Quito's Climate Change Strategy: A Response to  
905 Climate Change in the Metropolitan District of Quito, Ecuador, in: *Resilient Cities*, Dordrecht, 2011, 515-529,
- 906 Zhu, Z., Gallant, A. L., Woodcock, C. E., Pengra, B., Olofsson, P., Loveland, T. R., Jin, S., Dahal, D., Yang, L., and Auch,  
907 R. F.: Optimizing selection of training and auxiliary data for operational land cover classification for the LCMAP initiative,  
908 *ISPRS Journal of Photogrammetry and Remote Sensing*, 122, 206-221, <https://doi.org/10.1016/j.isprsjprs.2016.11.004>, 2016.  
909
